# Supplementary material for: The Transcriptional Coactivator Peroxisome Proliferator–Activated Receptor (PPAR)γ Coactivator-1α and the Nuclear Receptor PPARα Control the Expression of Glycerol Kinase and Metabolism Genes Independently of PPARγ Activation in Human White Adipocytes
Source: Oxford University Press journal article supplement (doi:10.2337/db06-1465), 2007-09-05
Supplement: db061465onlinesuptable.doc [file db061465onlinesuptable.doc]

Supplementary table 1. Primers used in real time quantitative PCR

| mARN | Accession number | Sense primer | Antisense primer | Amplicon  size (pb) |
| --- | --- | --- | --- | --- |
| Human cytochrome c | BC008477 | 5'-AGGCCCCTGGATACTCTTACACAG-3' | 5'-TCAGTGTATCCTCTCCCCAGATG-3' | 69 |
| Human gllycerol kinase | BC042421 | 5'-TAATACAGGCCATAAGTGTGTATTTTCTG-3' | 5'-ACTGGTTTGTCTCTGCCAAGTTT-3' | 81 |
| Murine glycerol kinase | NM_008194 | 5'-CCGCGAAGAAAGCAGTTCTG-3' | 5'-CAAAAAACGTGTCGAGCTGGTA-3' | 71 |
| Human gllycerol kinase (ChIP) | BC042421 | 5’-TGTGCTGCCAAACAAATAATTTG-3’ | 5’-AAATCCCTGACCACGTTTGAA-3’ | 83 |
| Human GOT1 | NM_002079 | 5'-AAGATCGTGCGGATTACTTGGT-3' | 5'-GCTGGCCACAATTCGTGC-3' | 75 |
| Murine/Human PGC-1 | NM_008904 | 5'-AAAGGATGCGCTCTCGTTCA-3' | 5'-GGAATATGGTGATCGGGAACA-3' | 65 |
| Murine PPAR | NM_011144 | 5'-AGTTCACGCATGTGAAGGCTG-3' | 5'-GATTCAGAAGAAGAACCGGAAC-3' | 109 |
| Human SLC25A4 | NM_001151 | 5'-AATACCTCAGAAGAGATGCTT-3' | 5'-ACAAAATACATGTGTGGTTTAATGAACA-3' | 56 |

Supplementary table 2. Liste of genes regulated by PGC-1 and/or rosiglitazone and acid retinoic.

Cluster 1 : PGC-1 up regulated genes.

| Clones | Unigene number | Name | Symbol | Ratio |
| --- | --- | --- | --- | --- |
| IMAGE:430318 | Hs.295449 | parvalbumin | PVALB | 7.35 |
| IMAGE:51702 | Hs.597 | glutamic-oxaloacetic transaminase 1, soluble (aspartate aminotransferase 1) | GOT1 | 5.10 |
| IMAGE:78353 | Hs.438737 | metallothionein 1F (functional) | MT1F | 4.89 |
| IMAGE:1456118 | Hs.381081 | proteasome (prosome, macropain) subunit, beta type, 9 (large multifunctional protease 2) | PSMB9 | 4.79 |
| IMAGE:40026  IMAGE : 297392 | Hs.2043  Hs.374950 | solute carrier family 25 (mitochondrial carrier; adenine nucleotide translocator), member 4  metallothionein 1X | SLC25A4  MT1X | 4.65  4.25 |
| IMAGE:1323591 | Hs.76353 | serine (or cysteine) proteinase inhibitor, clade A (alpha-1 antiproteinase, antitrypsin), member 3 | SERPINA3 | 3.85 |
| IMAGE:1898791 | Hs.224137 | hypothetical protein HSPC109 | HSPC109 | 3.85 |
| IMAGE:257136 | Hs.4113 | S-adenosylhomocysteine hydrolase-like 1 | AHCYL1 | 3.64 |
| IMAGE:810316 | Hs.250616 | isocitrate dehydrogenase 3 (NAD+) alpha | IDH3A | 3.28 |
| IMAGE:51826 | Hs.106620 | nicotinamide nucleotide transhydrogenase | NNT | 3.25 |
| IMAGE:291426 | Hs.7218 | acetyl-Coenzyme A synthetase 2 (AMP forming)-like | ACAS2L | 3.06 |
| IMAGE:1456424 | Hs.103502 | glutamic-pyruvate transaminase (alanine aminotransferase) | GPT | 3.04 |
| IMAGE:1468722 | Hs.194061 | ets variant gene 2 | ETV2 | 3.02 |
| IMAGE:66694 | Hs.358997 | tubulin tyrosine ligase | TTL | 2.73 |
| IMAGE:2019750 | Hs.430576 | SEC14-like 2 (S. cerevisiae) | SEC14L2 | 2.69 |
| IMAGE:2248368 | Hs.1955 | serum amyloid A2 | SAA2 | 2.66 |
| IMAGE:2391979 | Hs.272499 | dehydrogenase/reductase (SDR family) member 2 | DHRS2 | 2.63 |
| IMAGE:364800 | Hs.302051 | myosin head domain containing 1 | MYOHD1 | 2.55 |
| IMAGE:25274 | Hs.21050 | g20 protein | LOC51161 | 2.55 |
| IMAGE:1416782 | Hs.173724 | creatine kinase, brain | CKB | 2.53 |
| IMAGE:502542 | Hs.355819 | translocase of inner mitochondrial membrane 50 homolog (yeast) | TIMM50 | 2.51 |
| IMAGE:840158 | Hs.118625 | hexokinase 1 | HK1 | 2.50 |
| IMAGE:810391 | Hs.75619 | hyaluronoglucosaminidase 1 | HYAL1 | 2.45 |
| IMAGE:35300 | Hs.434243 | KIBRA protein | KIBRA | 2.40 |
| IMAGE:161456 | Hs.332053 | serum amyloid A1 | SAA1 | 2.40 |
| IMAGE:743811 | Hs.429506 | NADH dehydrogenase (ubiquinone) Fe-S protein 3, 30kDa (NADH-coenzyme Q reductase) | NDUFS3 | 2.37 |
| IMAGE:757462 | Hs.5243 | growth and transformation-dependent protein | E2IG5 | 2.33 |
| IMAGE:281392 | Hs.234074 | delta-notch-like EGF repeat-containing transmembrane | DNER | 2.32 |
| IMAGE:811770 | Hs.284286 | mitochondrial ribosomal protein S24 | MRPS24 | 2.28 |
| IMAGE:795965 | Hs.80691 | creatine kinase, mitochondrial 2 (sarcomeric) | CKMT2 | 2.27 |
| IMAGE:788518 | Hs.180612 | peroxisomal membrane protein 3, 35kDa (Zellweger syndrome) | PXMP3 | 2.27 |
| IMAGE:796694 | Hs.1578 | baculoviral IAP repeat-containing 5 (survivin) | BIRC5 | 2.24 |
| IMAGE:610012 | Hs.408614 | sialyltransferase 8A (alpha-N-acetylneuraminate: alpha-2,8-sialyltransferase, GD3 synthase) | SIAT8A | 2.23 |
| IMAGE:26297 | Hs.480595 | Transcribed sequences |  | 2.22 |
| IMAGE:1631762 | Hs.15977 | NADH dehydrogenase (ubiquinone) 1 beta subcomplex, 9, 22kDa | NDUFB9 | 2.17 |
| IMAGE:392622 | Hs.406510 | ATP synthase, H+ transporting, mitochondrial F1 complex, beta polypeptide | ATP5B | 2.13 |
| IMAGE:502683 | Hs.448680 | Hypothetical gene supported by BC052560 (LOC387763), mRNA |  | 2.13 |
| IMAGE:753457 | Hs.420563 | NADH dehydrogenase (ubiquinone) Fe-S protein 1, 75kDa (NADH-coenzyme Q reductase) | NDUFS1 | 2.12 |
| IMAGE:810942 | Hs.410197 | isocitrate dehydrogenase 3 (NAD+) gamma | IDH3G | 2.10 |
| IMAGE:2460404 | Hs.436405 | isocitrate dehydrogenase 3 (NAD+) beta | IDH3B | 2.10 |
| IMAGE:159462 | Hs.148101 | CDC42 effector protein (Rho GTPase binding) 1 | CDC42EP1 | 2.09 |
| IMAGE:812068 | Hs.237642 | kallikrein B, plasma (Fletcher factor) 1 | KLKB1 | 2.06 |
| IMAGE:488505 | Hs.388375 | solute carrier family 6 (neurotransmitter transporter, creatine), member 8 | SLC6A8 | 2.04 |
| IMAGE:687054 | Hs.307905 | v-rel reticuloendotheliosis viral oncogene homolog B, nuclear factor of kappa light polypeptide gene enhancer in B-cells 3 (avian) | RELB | 2.03 |
| IMAGE:51920 | Hs.415753 | oxysterol binding protein-like 1A | OSBPL1A | 2.01 |
| IMAGE:345645 | Hs.1976 | platelet-derived growth factor beta polypeptide (simian sarcoma viral (v-sis) oncogene homolog) | PDGFB | 2.00 |
| IMAGE:2516036 | Hs.442540 | actin binding LIM protein 1 | ABLIM1 | 1.99 |
| IMAGE:34526 | Hs.409081 | kynurenine 3-monooxygenase (kynurenine 3-hydroxylase) | KMO | 1.96 |
| IMAGE:2565853 | Hs.401903 | cytochrome c oxidase subunit Va | COX5A | 1.95 |
| IMAGE:502141 | Hs.90443 | NADH dehydrogenase (ubiquinone) Fe-S protein 8, 23kDa (NADH-coenzyme Q reductase) | NDUFS8 | 1.94 |
| IMAGE:2577778 | Hs.119251 | ubiquinol-cytochrome c reductase core protein I | UQCRC1 | 1.93 |
| IMAGE:490060 | Hs.246914 | hypothetical protein MGC16202 | MGC16202 | 1.93 |
| IMAGE:490060 | Hs.246914 | hypothetical protein MGC16202 | MGC16202 | 1.93 |
| IMAGE:1589973 | Hs.61472 | bolA-like 3 (E. coli) | BOLA3 | 1.93 |
| IMAGE:1584503 | Hs.438219 | G protein pathway suppressor 2 | GPS2 | 1.92 |
| IMAGE:262932 | Hs.202505 | RNA polymerase III subunit RPC8 | RPC8 | 1.92 |
| IMAGE:209066  IMAGE:209066 | Hs.250822  Hs.275711 | serine/threonine kinase 6  Peroxisome proliferative activated receptor, alpha | STK6  PPARa | 1.90  1.89 |
| IMAGE:283173 | Hs.17719 | KIAA0114 gene product | KIAA0114 | 1.89 |
| IMAGE:811867 | Hs.32196 | mitochondrial ribosomal protein L36 | MRPL36 | 1.85 |
| IMAGE:328768 | Hs.252359 | Transcribed sequence with weak similarity to protein ref:NP_060312.1 (H.sapiens) hypothetical protein FLJ20489 [Homo sapiens] |  | 1.85 |
| IMAGE:1455394 | Hs.437060 | cytochrome c, somatic | CYCS | 1.84 |
| IMAGE:813830 | Hs.289271 | cytochrome c-1 | CYC1 | 1.83 |
| IMAGE:205185 | Hs.2030 | thrombomodulin | THBD | 1.82 |
| IMAGE:810998 | Hs.7978 | DKFZP434C131 protein | DKFZP434C131 | 1.81 |
| IMAGE:1761925 | Hs.199270 | cytochrome P450, family 27, subfamily B, polypeptide 1 | CYP27B1 | 1.81 |
| IMAGE:435894 | Hs.352548 | Transmembrane protein 149 | TMEM149 | 1.80 |
| IMAGE:327635 | Hs.76240 | adenylate kinase 1 | AK1 | 1.78 |
| IMAGE:1009824 | Hs.433902 | D-dopachrome tautomerase | DDT | 1.77 |
| IMAGE:328810 | Hs.166351 | protein phosphatase 1E (PP2C domain containing) | PPM1E | 1.76 |
| IMAGE:648011 | Hs.437338 | NDRG family member 3 | NDRG3 | 1.76 |
| IMAGE:2556946 | Hs.403997 | villin 2 (ezrin) | VIL2 | 1.76 |
| IMAGE:2488760 | Hs.430606 | citrate synthase | CS | 1.75 |
| IMAGE:2465022 | Hs.108080 | cysteine and glycine-rich protein 1 | CSRP1 | 1.75 |
| IMAGE:897177 | Hs.511830 | Similar to Phosphoglycerate mutase 1 (Phosphoglycerate mutase isozyme B) (PGAM-B) (BPG-dependent PGAM 1) (LOC144483), mRNA |  | 1.71 |
| IMAGE:136668 | Hs.436518 | RNA-binding protein with multiple splicing 2 | RBPMS2 | 1.70 |
| IMAGE:1556404 | Hs.31181 | Similar to RIKEN cDNA F730108M23 gene (LOC400734), mRNA |  | 1.70 |
| IMAGE:52704 | Hs.21902 | zinc finger, DHHC domain containing 23 | ZDHHC23 | 1.69 |
| IMAGE:809517 | Hs.380253 | mitochondrial ribosomal protein L21 | MRPL21 | 1.67 |
| IMAGE:296880 | Hs.422215 | membrane protein, palmitoylated 1, 55kDa | MPP1 | 1.66 |
| IMAGE:729957 | Hs.46743 | McKusick-Kaufman syndrome | MKKS | 1.66 |
| IMAGE:729957 | Hs.46743 | McKusick-Kaufman syndrome | MKKS | 1.66 |
| IMAGE:1584313 | Hs.125902 | ubiquitin specific protease 2 | USP2 | 1.65 |
| IMAGE:859359 | Hs.50649 | tumor protein p53 inducible protein 3 | TP53I3 | 1.64 |
| IMAGE:1740151 | Hs.204891 | interleukin 11 receptor, alpha | IL11RA | 1.64 |
| IMAGE:755750 | Hs.433416 | non-metastatic cells 2, protein (NM23B) expressed in | NME2 | 1.63 |
| IMAGE:298965 | Hs.431668 | cytochrome c oxidase subunit VIb | COX6B | 1.62 |
| IMAGE:742115 | Hs.403436 | dodecenoyl-Coenzyme A delta isomerase (3,2 trans-enoyl-Coenzyme A isomerase) | DCI | 1.62 |
| IMAGE:431293 | Hs.197045 | chromosome 14 open reading frame 125 | C14orf125 | 1.61 |
| IMAGE:34462 | Hs.26309 | hypothetical protein FLJ37078 | FLJ37078 | 1.61 |
| IMAGE:1522696 | Hs.176950 | chromosome 20 open reading frame 44 | C20orf44 | 1.61 |
| IMAGE:241815 | Hs.240 | M-phase phosphoprotein 1 | MPHOSPH1 | 1.61 |
| IMAGE:511632 | Hs.437186 | polymerase (RNA) III (DNA directed) polypeptide K, 12.3 kDa | POLR3K | 1.60 |
| IMAGE:951216 | Hs.198274 | NADH dehydrogenase (ubiquinone) 1 beta subcomplex, 10, 22kDa | NDUFB10 | 1.59 |
| IMAGE:1572070 | Hs.512774 | Ras association (RalGDS/AF-6) domain family 4 | RASSF4 | 1.59 |
| IMAGE:110772 | Hs.109052 | chromosome 14 open reading frame 2 | C14orf2 | 1.58 |
| IMAGE:279691 | Hs.385862 | mitochondrial ribosomal protein S9 | MRPS9 | 1.58 |
| IMAGE:470175 | Hs.3548 | mature T-cell proliferation 1 | MTCP1 | 1.58 |
| IMAGE:1031592 | Hs.373627 | kinesin family member 9 | KIF9 | 1.58 |
| IMAGE:80915 | Hs.440475 | succinate dehydrogenase complex, subunit A, flavoprotein (Fp) | SDHA | 1.58 |
| IMAGE:67759 | Hs.100194 | arachidonate 5-lipoxygenase-activating protein | ALOX5AP | 1.58 |
| IMAGE:745116 | Hs.284279 | heme oxygenase (decycling) 2 | HMOX2 | 1.57 |
| IMAGE:768043 | Hs.22199 | likely ortholog of mouse signaling intermediate in Toll pathway-evolutionarily conserved | SITPEC | 1.57 |
| IMAGE:2548661 | Hs.123178 | translocase of inner mitochondrial membrane 44 homolog (yeast) | TIMM44 | 1.56 |
| 1292581 | Hs.511840 | Transcribed sequence with moderate similarity to protein sp:P53796 (H.sapiens) S6AA_HUMAN Sodium- and chloride-dependent creatine transporter 2 |  | 1.55 |
| IMAGE:1010420 | Hs.489132 | BET1 homolog (S. cerevisiae) | BET1 | 1.54 |
| IMAGE:788285 | Hs.211202 | endothelin receptor type A | EDNRA | 1.53 |
| IMAGE:1010155 | Hs.111256 | arachidonate 15-lipoxygenase, second type | ALOX15B | 1.53 |
| IMAGE:2062341  IMAGE:1848977 | Hs.154036  Hs.1466 | pleckstrin homology-like domain, family A, member 2  glycerol kinase | PHLDA2  GK | 1.52  1.52 |
| IMAGE:840894 | Hs.180714 | cytochrome c oxidase subunit VIa polypeptide 1 | COX6A1 | 1.51 |
| IMAGE:725188 | Hs.75375 | malate dehydrogenase 1, NAD (soluble) | MDH1 | 1.51 |
| IMAGE:1606893 | Hs.500098 | Similar to upstream binding protein 1 | LOC642851 | 1.51 |
| IMAGE:1636069 | Hs.109059 | mitochondrial ribosomal protein L12 | MRPL12 | 1.49 |
| IMAGE:2322038 | Hs.408 | collagen, type IV, alpha 6 | COL4A6 | 1.49 |
| IMAGE:645662 | Hs.511769 | Serum amyloid A-like 1 | SAAL1 | 1.48 |
| IMAGE:28510 | Hs.2998 | contactin 2 (axonal) | CNTN2 | 1.48 |
| IMAGE:486175 | Hs.75231 | solute carrier family 16 (monocarboxylic acid transporters), member 1 | SLC16A1 | 1.47 |
| IMAGE:428560 | Hs.356626 | QIL1 protein | QIL1 | 1.46 |
| IMAGE:995444  IMAGE:344432 | Hs.149103  Hs.81874 | arylsulfatase B  microsomal glutathione S-transferase | ARSB  MGST2 | 1.46  1.45 |
| IMAGE:868400 | Hs.79322 | glutaminyl-tRNA synthetase | QARS | 1.45 |
| IMAGE:810552 | Hs.444499 | repressor of estrogen receptor activity | REA | 1.45 |
| IMAGE:845519 | Hs.155433 | ATP synthase, H+ transporting, mitochondrial F1 complex, gamma polypeptide 1 | ATP5C1 | 1.44 |
| IMAGE:115111 | Hs.16258 | RAB24, member RAS oncogene family | RAB24 | 1.44 |
| IMAGE:2027560 | Hs.434986 | heme-regulated initiation factor 2-alpha kinase | HRI | 1.43 |
| IMAGE:1637751 | Hs.151134 | oxidase (cytochrome c) assembly 1-like | OXA1L | 1.43 |
| IMAGE:812169 | Hs.387988 | mitochondrial ribosomal protein S5 | MRPS5 | 1.41 |

Cluster 2 : PGC-1 down regulated genes.

| Clones | Unigene number | Name | Symbol | Ratio |
| --- | --- | --- | --- | --- |
| IMAGE:1984786 | Hs.432402 | breast carcinoma amplified sequence 3 | BCAS3 | 0.51 |
| IMAGE:1901097 | Hs.350554 | glycerol-3-phosphate dehydrogenase 1 (soluble) | GPD1 | 0.53 |
| IMAGE:950463 | Hs.187763 | bromodomain-containing protein 4 | BRD4 | 0.53 |
| IMAGE:2012523 | Hs.502696 | Similar to Fatty acid-binding protein, epidermal (E-FABP) | LOC653327 | 0.54 |
| IMAGE:983039 | Hs.105340 | WD repeat and FYVE domain containing 3 | WDFY3 | 0.55 |
| IMAGE:1985494 | Hs.432401 | Proline rich membrane anchor 1 | PRIMA1 | 0.58 |
| IMAGE:588911 | Hs.442936 | 2',5'-oligoadenylate synthetase 1, 40/46kDa | OAS1 | 0.61 |
| IMAGE:232826 | Hs.439511 | actin related protein 2/3 complex, subunit 3, 21kDa | ARPC3 | 0.64 |
| IMAGE:741831 | Hs.439312 | phospholipid transfer protein | PLTP | 0.67 |
| IMAGE:2310241 | Hs.413557 | aspartate beta-hydroxylase | ASPH | 0.68 |
| IMAGE:754998 | Hs.2943 | signal recognition particle 19kDa | SRP19 | 0.73 |

Cluster3 : Rosiglitazone and retinoic acid up regulated genes.

| Clones | Unigene number | Name | Symbol | Ratio |
| --- | --- | --- | --- | --- |
| IMAGE:841282 | Hs.105700 | secreted frizzled-related protein 4 | SFRP4 | 11.16 |
| IMAGE:753620 | Hs.274313 | insulin-like growth factor binding protein 6 | IGFBP6 | 10.20 |
| IMAGE:69002 | Hs.9613 | angiopoietin-like 4 | ANGPTL4 | 6.07 |
| IMAGE:502625 | Hs.47099 | UDP-N-acetyl-alpha-D-galactosamine:polypeptide N-acetylgalactosaminyltransferase 12 (GalNAc-T12) | GALNT12 | 5.95 |
| IMAGE:84730 | Hs.154078 | lipopolysaccharide binding protein | LBP | 4.73 |
| IMAGE:2209734 | Hs.146688 | prostaglandin E synthase | PTGES | 4.70 |
| IMAGE:2016775 | Hs.448805 | G protein-coupled receptor. family C. group 5. member B | GPRC5B | 4.45 |
| IMAGE:530608 | Hs.345588 | hypothetical protein MGC45871 | MGC45871 | 4.36 |
| IMAGE:502155 | Hs.302085 | prostaglandin I2 (prostacyclin) synthase | PTGIS | 3.92 |
| IMAGE:78946 | Hs.8364 | pyruvate dehydrogenase kinase. isoenzyme 4 | PDK4 | 3.79 |
| IMAGE:33603 | Hs.306382 | hypothetical protein MGC35048 | MGC35048 | 3.45 |
| IMAGE:197727 | Hs.15192 | phosphatidylethanolamine N-methyltransferase | PEMT | 3.25 |
| IMAGE:2308409 | Hs.409602 | sulfatase 1 | SULF1 | 3.08 |
| IMAGE:287300 | Hs.404355 | Myeloid/lymphoid or mixed-lineage leukemia (trithorax homolog, Drosophila); translocated to, 10 | MLLT10 | 3.01 |
| IMAGE:240248 | Hs.433923 | transferrin | TF | 2.81 |
| IMAGE:240248 | Hs.433923 | transferrin | TF | 2.81 |
| IMAGE:49499 | Hs.107513 | dedicator of cytokinesis 11 | DOCK11 | 2.79 |
| IMAGE:2543464 | Hs.388547 | Transcribed sequence with moderate similarity to protein sp:P01011 (H.sapiens) AACT_HUMAN Alpha-1-antichymotrypsin precursor |  | 2.79 |
| IMAGE:703581 | Hs.1908 | proteoglycan 1. secretory granule | PRG1 | 2.58 |
| IMAGE:154152 | Hs.473727 | SET domain containing 4 | SETD4 | 2.57 |
| IMAGE:813266 | Hs.421383 | four and a half LIM domains 1 | FHL1 | 2.57 |
| IMAGE:2017947 | Hs.104134 | homeo box (H6 family) 1 | HMX1 | 2.56 |
| IMAGE:130858 | Hs.54617 | family with sequence similarity 29. member A | FAM29A | 2.52 |
| IMAGE:594630 | Hs.17144 | dehydrogenase/reductase (SDR family) member 3 | DHRS3 | 2.51 |
| IMAGE:162775 | Hs.279806 | DEAD (Asp-Glu-Ala-Asp) box polypeptide 5 | DDX5 | 2.50 |
| IMAGE:1558394 | Hs.180878 | lipoprotein lipase | LPL | 2.48 |
| IMAGE:133988 | Hs.269559 | acyl-CoA synthetase long-chain family member 4 | ACSL4 | 2.46 |
| IMAGE:1758590 | Hs.268012 | acyl-CoA synthetase long-chain family member 3 | ACSL3 | 2.44 |
| IMAGE:855786 | Hs.82030 | tryptophanyl-tRNA synthetase | WARS | 2.39 |
| IMAGE:950603 | Hs.397465 | homeodomain interacting protein kinase 2 | HIPK2 | 2.38 |
| IMAGE:810485 | Hs.410900 | inhibitor of DNA binding 1. dominant negative helix-loop-helix protein | ID1 | 2.36 |
| IMAGE:1492287 | Hs.380824 | NS5ATP13TP2 protein | NS5ATP13TP2 | 2.35 |
| IMAGE:345616 | Hs.389964 | glycoprotein (transmembrane) nmb | GPNMB | 2.33 |
| IMAGE:855487 | Hs.324808 | N-acylsphingosine amidohydrolase (acid ceramidase) 1 | ASAH1 | 2.33 |
| IMAGE:1635667 | Hs.150748 | malonyl-CoA decarboxylase | MLYCD | 2.33 |
| IMAGE:343072 | Hs.287797 | integrin. beta 1 (fibronectin receptor. beta polypeptide. antigen CD29 includes MDF2. MSK12) | ITGB1 | 2.31 |
| IMAGE:136560 | Hs.194737 | vacuolar protein sorting 13D (yeast) | VPS13D | 2.31 |
| IMAGE:814053  IMAGE:206217 | Hs.11638  Hs.438863 | acyl-CoA synthetase long-chain family member 5  nuclear receptor subfamily 1, groupe H, member 3 | ACSL5  NR1H3 | 2.31  2.26 |
| IMAGE:753291 | Hs.12532 | chromosome 1 open reading frame 21 | C1orf21 | 2.25 |
| IMAGE:1671006 | Hs.306425 | inhibitor of Bruton agammaglobulinemia tyrosine kinase | IBTK | 2.24 |
| IMAGE:841046 | Hs.8904 | Ig superfamily protein | Z39IG | 2.21 |
| IMAGE:77911 | Hs.354793 | hypothetical protein FLJ20366 | FLJ20366 | 2.21 |
| IMAGE:742082 | Hs.1872 | phosphoenolpyruvate carboxykinase 1 (soluble) | PCK1 | 2.20 |
| IMAGE:25058 | Hs.386236 | Clone 25058 mRNA sequence | LOC441052 | 2.19 |
| IMAGE:376616 | Hs.391561 | fatty acid binding protein 4. adipocyte | FABP4 | 2.19 |
| IMAGE:1584411 | Hs.241535 | apolipoprotein L. 3 | APOL3 | 2.18 |
| IMAGE:360232 | Hs.348996 | CGI-100 protein | CGI-100 | 2.18 |
| IMAGE:840944 | Hs.326035 | early growth response 1 | EGR1 | 2.18 |
| IMAGE:2110301 | Hs.30332 | glutamine-fructose-6-phosphate transaminase 2 | GFPT2 | 2.18 |
| IMAGE:450533 | Hs.76353 | serine (or cysteine) proteinase inhibitor. clade A (alpha-1 antiproteinase. antitrypsin). member 3 | SERPINA3 | 2.15 |
| IMAGE:299465 | Hs.29423 | collectin sub-family member 12 | COLEC12 | 2.12 |
| IMAGE:813859 | Hs.98614 | ribosome binding protein 1 homolog 180kDa (dog) | RRBP1 | 2.09 |
| IMAGE:827168 | Hs.147259 | ATP-binding cassette. sub-family A (ABC1). member 1 | ABCA1 | 2.07 |
| IMAGE:202740 | Hs.31034 | peroxisomal biogenesis factor 11A | PEX11A | 2.05 |
| IMAGE:1637343 | Hs.79081 | protein phosphatase 1. catalytic subunit. gamma isoform | PPP1CC | 2.02 |
| IMAGE:625623 | Hs.435735 | solute carrier family 5 (sodium-dependent vitamin transporter). member 6 | SLC5A6 | 2.01 |
| IMAGE:109863 | Hs.356835 | epithelial membrane protein 2 | EMP2 | 2.00 |
| IMAGE:1941633 | Hs.282982 | solute carrier family 25. (mitochondrial carrier). member 18 | SLC25A18 | 1.99 |
| IMAGE:505904 | Hs.146233 | neuralized-like (Drosophila) | NEURL | 1.98 |
| IMAGE:128515 | Hs.128856 | scavenger receptor class A. member 3 | SCARA3 | 1.98 |
| IMAGE:61502 | Hs.436602 | poliovirus receptor-related 3 | PVRL3 | 1.96 |
| IMAGE:472081 | Hs.50841 | GRINL1A combined protein | Gcom1 | 1.96 |
| IMAGE:201394 | Hs.488569 | Transcribed sequences |  | 1.95 |
| IMAGE:308437 | Hs.576 | fucosidase. alpha-L- 1. tissue | FUCA1 | 1.95 |
| IMAGE:730555 | Hs.82646 | DnaJ (Hsp40) homolog. subfamily B. member 1 | DNAJB1 | 1.94 |
| IMAGE:2310272 | Hs.11806 | 7-dehydrocholesterol reductase | DHCR7 | 1.93 |
| IMAGE:417814 | Hs.512842 | Transcribed sequence with strong similarity to protein ref:NP_000173.1 (H.sapiens) hydroxyacyl-Coenzyme A dehydrogenase/3-ketoacyl-Coenzyme A thiolase/enoyl-Coenzyme A hydratase |  | 1.93 |
| IMAGE:340630 | Hs.432453 | mitogen-activated protein kinase kinase kinase 8 | MAP3K8 | 1.93 |
| IMAGE:447537 | Hs.525566 | MRNA. chromosome 1 specific transcript KIAA0500. | KIAA0500 | 1.92 |
| IMAGE:1880989 | Hs.406491 | transducin-like enhancer of split 1 (E(sp1) homolog. Drosophila) | TLE1 | 1.90 |
| IMAGE:357117 | Hs.288932 | likely ortholog of mouse Mak3p homolog (S. cerevisiae) | MAK3P | 1.88 |
| IMAGE:240694 | Hs.21293 | UDP-N-acetylglucosamine pyrophosphorylase 1 | UAP1 | 1.87 |
| IMAGE:1257131 | Hs.184727 | Similar to cleavage and polyadenylation specific factor 6. 68kD subunit. clone IMAGE:4819488. mRNA |  | 1.86 |
| IMAGE:767823 | Hs.14606 | palmdelphin | PALMD | 1.86 |
| IMAGE:123085 | Hs.529287 | Transcribed sequence with weak similarity to protein ref:NP_113661.1 (H.sapiens) hypothetical protein MGC4027 [Homo sapiens] |  | 1.85 |
| IMAGE:613056 | Hs.167791 | reticulocalbin 1. EF-hand calcium binding domain | RCN1 | 1.84 |
| IMAGE:711768 | Hs.76057 | galactose-4-epimerase. UDP- | GALE | 1.83 |
| IMAGE:49903 | Hs.388344 | cell adhesion molecule with homology to L1CAM (close homolog of L1) | CHL1 | 1.83 |
| IMAGE:841415 | Hs.10706 | epithelial protein lost in neoplasm beta | EPLIN | 1.82 |
| IMAGE:377469 | Hs.217297 | chromosome 9 open reading frame 94 | C9orf94 | 1.81 |
| IMAGE:121252 | Hs.7503 | hypothetical protein FLJ14153 | FLJ14153 | 1.81 |
| IMAGE:33126 | Hs.110445 | Shwachman-Bodian-Diamond syndrome | SBDS | 1.81 |
| IMAGE:649743 | Hs.287749 | sterol-C5-desaturase (ERG3 delta-5-desaturase homolog. fungal)-like | SC5DL | 1.81 |
| IMAGE:2542582 | Hs.194431 | palladin | KIAA0992 | 1.79 |
| IMAGE:856447 | Hs.14623 | interferon. gamma-inducible protein 30 | IFI30 | 1.79 |
| IMAGE:843139 | Hs.166887 | copine I | CPNE1 | 1.78 |
| IMAGE:1630411 | Hs.272168 | tumor differentially expressed 1 | TDE1 | 1.76 |
| IMAGE:2542199 | Hs.444548 | NP220 nuclear protein | NP220 | 1.76 |
| IMAGE:207550 | Hs.310230 | translocation associated membrane protein 2 | TRAM2 | 1.75 |
| IMAGE:757961 | Hs.82240 | syntaxin 3A | STX3A | 1.73 |
| IMAGE:47518 | Hs.511739 | SUMO-1 activating enzyme subunit 2 | UBA2 | 1.73 |
| IMAGE:178805 | Hs.135056 | chromosome 20 open reading frame 139 | C20orf139 | 1.73 |
| IMAGE:356732 | Hs.250607 | utrophin (homologous to dystrophin) | UTRN | 1.72 |
| IMAGE:1662419 | Hs.156650 | chromosome 20 open reading frame 82 | C20orf82 | 1.72 |
| IMAGE:1584628 | Hs.71719 | PDZ and LIM domain 3 | PDLIM3 | 1.72 |
| IMAGE:113206 | Hs.432918 | arginyl-tRNA synthetase-like | RARSL | 1.71 |
| IMAGE:2027578 | Hs.96200 | A kinase (PRKA) anchor protein 8-like | AKAP8L | 1.71 |
| IMAGE:1563144 | Hs.408429 | inositol 1.3.4-triphosphate 5/6 kinase | ITPK1 | 1.71 |
| IMAGE:272576 | Hs.167115 | KIAA0830 protein | KIAA0830 | 1.70 |
| IMAGE:52646 | Hs.156814 | KIAA0377 gene product | KIAA0377 | 1.70 |
| IMAGE:2510009 | Hs.43445 | poly(A)-specific ribonuclease (deadenylation nuclease) | PARN | 1.69 |
| IMAGE:815047 | Hs.4859 | cyclin L1 | CCNL1 | 1.69 |
| IMAGE:823723 | Hs.302669 | Transcribed sequence with moderate similarity to protein ref:NP_060312.1 (H.sapiens) hypothetical protein FLJ20489 [Homo sapiens] |  | 1.68 |
| IMAGE:201443 | Hs.442707 | telomeric repeat binding factor (NIMA-interacting) 1 | TERF1 | 1.68 |
| IMAGE:1630934 | Hs.371282 | transcription factor 3 (E2A immunoglobulin enhancer binding factors E12/E47) | TCF3 | 1.67 |
| IMAGE:40871 | Hs.530552 | putative protein similar to nessy (Drosophila) | C3F | 1.67 |
| IMAGE:877637 | Hs.91612 | hypothetical protein MGC23937 similar to CG4798 | MGC23937 | 1.66 |
| IMAGE:196005 | Hs.234642 | aquaporin 3 | AQP3 | 1.66 |
| IMAGE:486984 | Hs.6298 | neuron navigator 1 | NAV1 | 1.66 |
| IMAGE:841331 | Hs.79889 | monocyte to macrophage differentiation-associated | MMD | 1.65 |
| IMAGE:811061 | Hs.361155 | flavin containing monooxygenase 2 | FMO2 | 1.65 |
| IMAGE:785980 | Hs.513418 | hLAT1-3TM | IMAA | 1.64 |
| IMAGE:71154 | Hs.143482 | peptidylprolyl isomerase D (cyclophilin D) | PPID | 1.64 |
| IMAGE:841295 | Hs.337625 | hypothetical protein FLJ10081 | FLJ10081 | 1.64 |
| IMAGE:827152 | Hs.13845 | solute carrier family 25 (carnitine/acylcarnitine translocase). member 20 | SLC25A20 | 1.63 |
| IMAGE:786083 | Hs.371278 | ubiquitin-conjugating enzyme E2 variant 2 | UBE2V2 | 1.63 |
| IMAGE:950890 | Hs.149436 | kinesin family member 5B | KIF5B | 1.63 |
| IMAGE:897690 | Hs.192374 | tumor rejection antigen (gp96) 1 | TRA1 | 1.61 |
| IMAGE:868630 | Hs.114360 | transforming growth factor beta-stimulated protein TSC-22 | TSC22 | 1.60 |
| IMAGE:240249 | Hs.279518 | amyloid beta (A4) precursor-like protein 2 | APLP2 | 1.59 |
| IMAGE:324437 | Hs.789 | chemokine (C-X-C motif) ligand 1 (melanoma growth stimulating activity. alpha) | CXCL1 | 1.59 |
| IMAGE:283723 | Hs.432996 | similar to splicing factor. arginine/serine-rich 4 | FLJ11021 | 1.59 |
| IMAGE:143443 | Hs.444510 | thromboxane A synthase 1 (platelet. cytochrome P450. family 5. subfamily A) | TBXAS1 | 1.58 |
| IMAGE:884799 | Hs.27258 | Siah-interacting protein | SIP | 1.58 |
| IMAGE:51015 | Hs.434957 | Clone IMAGE:3618365. mRNA |  | 1.58 |
| IMAGE:75254 | Hs.10526 | cysteine and glycine-rich protein 2 | CSRP2 | 1.57 |
| IMAGE:837864 | Hs.94262 | progestin induced protein | DD5 | 1.57 |
| IMAGE:460629 | Hs.512609 | ankyrin repeat and SOCS box-containing 1 | ASB1 | 1.57 |
| IMAGE:48626 | Hs.7089 | insulin induced gene 2 | INSIG2 | 1.57 |
| IMAGE:815781 | Hs.36927 | heat shock 105kDa/110kDa protein 1 | HSPH1 | 1.57 |
| IMAGE:838504 | Hs.8203 | SM-11044 binding protein | SMBP | 1.57 |
| IMAGE:261699 | Hs.449601 | immunoglobulin lambda joining 3 | IGLJ3 | 1.55 |
| IMAGE:796646 | Hs.443409 | ornithine decarboxylase 1 | ODC1 | 1.55 |
| IMAGE:26474 | Hs.25647 | v-fos FBJ murine osteosarcoma viral oncogene homolog | FOS | 1.55 |
| IMAGE:1567721 | Hs.408576 | destrin (actin depolymerizing factor) | DSTN | 1.55 |
| IMAGE:280699 | Hs.46721 | upregulated in colorectal cancer gene 1 | UCC1 | 1.54 |
| IMAGE:705110 | Hs.329502 | caspase 9. apoptosis-related cysteine protease | CASP9 | 1.54 |
| IMAGE:2016869 | Hs.210850 | HECT domain containing 1 | HECTD1 | 1.54 |
| IMAGE:610113 | Hs.11183 | sorting nexin 2 | SNX2 | 1.54 |
| IMAGE:47186 | Hs.323079 | protein tyrosine phosphatase. receptor type. D | PTPRD | 1.54 |
| IMAGE:784129 | Hs.25001 | tyrosine 3-monooxygenase/tryptophan 5-monooxygenase activation protein. gamma polypeptide | YWHAG | 1.53 |
| IMAGE:1631853 | Hs.87385 | chromosome 7 open reading frame 30 | C7orf30 | 1.53 |
| IMAGE:796442 | Hs.156324 | protein kinase. cAMP-dependent. catalytic. beta | PRKACB | 1.53 |
| IMAGE:825697 | Hs.144949 | zinc finger protein 313 | ZNF313 | 1.53 |
| IMAGE:179232 | Hs.380830 | pyrophosphatase (inorganic) | PP | 1.52 |
| IMAGE:246786 | Hs.231853 | chemokine orphan receptor 1 | CMKOR1 | 1.52 |
| IMAGE:167268 | Hs.216485 | chromosome 19 open reading frame 12 | C19orf12 | 1.52 |
| IMAGE:878449 | Hs.103042 | microtubule-associated protein 1B | MAP1B | 1.52 |
| IMAGE:259953 | Hs.192619 | KIAA1600 | KIAA1600 | 1.52 |
| IMAGE:827187 | Hs.13854 | T-cell activation protein phosphatase 2C | TA-PP2C | 1.52 |
| IMAGE:295137 | Hs.32042 | aspartoacylase (aminoacylase 2. Canavan disease) | ASPA | 1.52 |
| IMAGE:71672 | Hs.169919 | electron-transfer-flavoprotein. alpha polypeptide (glutaric aciduria II) | ETFA | 1.51 |
| IMAGE:897761 | Hs.135705 | SWI/SNF related. matrix associated. actin dependent regulator of chromatin. subfamily a. member 5 | SMARCA5 | 1.51 |
| IMAGE:843008 | Hs.315230 | translation factor sui1 homolog | GC20 | 1.51 |
| IMAGE:1635266 | Hs.163724 | osteopetrosis associated transmembrane protein 1 | OSTM1 | 1.51 |
| IMAGE:2556648 | Hs.380774 | DEAD (Asp-Glu-Ala-Asp) box polypeptide 3. X-linked | DDX3X | 1.51 |
| IMAGE:51899 | Hs.301658 | KIAA0513 gene product | KIAA0513 | 1.51 |
| IMAGE:342685 | Hs.170226 | chromosome 9 open reading frame 91 | C9orf91 | 1.51 |
| IMAGE:731118 | Hs.156114 | protein tyrosine phosphatase. non-receptor type substrate 1 | PTPNS1 | 1.50 |
| IMAGE:135900 | Hs.24684 | arrestin domain containing 3 | ARRDC3 | 1.50 |
| IMAGE:276816 | Hs.222707 | KIAA1718 protein | KIAA1718 | 1.50 |
| IMAGE:711918 | Hs.79033 | glutaminyl-peptide cyclotransferase (glutaminyl cyclase) | QPCT | 1.50 |
| IMAGE:827013 | Hs.440968 | tumor protein p53 binding protein. 1 | TP53BP1 | 1.49 |
| IMAGE:142130 | Hs.107149 | chromosome 1 open reading frame 25 | C1orf25 | 1.49 |
| IMAGE:275871 | Hs.419776 | nucleosome assembly protein 1-like 1 | NAP1L1 | 1.49 |
| IMAGE:447404 | Hs.512627 | Integrator complex subunit 10 | INTS10 | 1.48 |
| IMAGE:132464 | Hs.358898 | Pleckstrin homology domain containing, family A (phosphoinositide binding specific) member 8 | PLEKHA8 | 1.48 |
| IMAGE:416627 | Hs.4190 | hypothetical protein FLJ40432 | FLJ40432 | 1.48 |
| IMAGE:38642 | Hs.150595 | cytochrome P450. family 26. subfamily A. polypeptide 1 | CYP26A1 | 1.48 |
| IMAGE:795858 | Hs.214174 | Transcribed sequence with moderate similarity to protein ref:NP_055301.1 (H.sapiens) neuronal thread protein [Homo sapiens] |  | 1.48 |
| IMAGE:259859 | Hs.334534 | glucosamine (N-acetyl)-6-sulfatase (Sanfilippo disease IIID) | GNS | 1.47 |
| IMAGE:1470530 | Hs.435788 | nuclear receptor coactivator 6 | NCOA6 | 1.47 |
| IMAGE:868652 | Hs.150833 | complement component 4A | C4A | 1.47 |
| IMAGE:796152 | Hs.439190 | chromosome 14 open reading frame 31 | C14orf31 | 1.47 |
| IMAGE:839698 | Hs.76917 | F-box only protein 8 | FBXO8 | 1.46 |
| IMAGE:590242 | Hs.440905 | discoidin domain receptor family. member 2 | DDR2 | 1.46 |
| IMAGE:814776 | Hs.83572 | protein tyrosine phosphatase. non-receptor type 11 (Noonan syndrome 1) | PTPN11 | 1.46 |
| IMAGE:2288077 | Hs.8110 | L-3-hydroxyacyl-Coenzyme A dehydrogenase. short chain | HADHSC | 1.46 |
| IMAGE:416951 | Hs.155160 | Splicing factor. arginine/serine-rich. 46kD | SRP46 | 1.45 |
| IMAGE:897880 | Hs.374334 | chaperonin containing TCP1. subunit 4 (delta) | CCT4 | 1.45 |
| IMAGE:277687 | Hs.29956 | KIAA0460 protein | KIAA0460 | 1.45 |
| IMAGE:241256 | Hs.223745 | matrin 3 | MATR3 | 1.45 |
| IMAGE:433487 | Hs.50794 | cardiomyopathy associated 5 | CMYA5 | 1.44 |
| IMAGE:898265 | Hs.166975 | splicing factor. arginine/serine-rich 5 | SFRS5 | 1.44 |
| IMAGE:795604 | Hs.356061 | microtubule-associated protein 1 light chain 3 beta | MAP1LC3B | 1.44 |
| IMAGE:45376 | Hs.172506 | acetyl-Coenzyme A acyltransferase 2 (mitochondrial 3-oxoacyl-Coenzyme A thiolase) | ACAA2 | 1.44 |
| IMAGE:746163 | Hs.414334 | glutathione reductase | GSR | 1.44 |
| IMAGE:897823 | Hs.372673 | heterogeneous nuclear ribonucleoprotein D-like | HNRPDL | 1.43 |
| IMAGE:769645 | Hs.225129 | N-deacetylase/N-sulfotransferase (heparan glucosaminyl) 2 | NDST2 | 1.43 |
| IMAGE:786069 | Hs.49349 | beta-site APP-cleaving enzyme | BACE | 1.43 |
| IMAGE:133136 | Hs.110713 | DEK oncogene (DNA binding) | DEK | 1.43 |
| IMAGE:2544165 | Hs.439510 | YME1-like 1 (S. cerevisiae) | YME1L1 | 1.42 |
| IMAGE:1493107 | Hs.294584 | leukotriene B4 12-hydroxydehydrogenase | LTB4DH | 1.42 |
| IMAGE:856961 | Hs.405590 | eukaryotic translation initiation factor 3. subunit 6 48kDa | EIF3S6 | 1.41 |
| IMAGE:1475730 | Hs.82916 | chaperonin containing TCP1. subunit 6A (zeta 1) | CCT6A | 1.40 |
| IMAGE:377346 | Hs.458355 | complement component 1. s subcomponent | C1S | 1.40 |
| IMAGE:970659 | Hs.180832 | arginyl-tRNA synthetase | RARS | 1.40 |
| IMAGE:588598 | Hs.413840 | vacuolar protein sorting 41 (yeast) | VPS41 | 1.40 |
| IMAGE:289615 | Hs.232432 | lysosomal-associated membrane protein 2 | LAMP2 | 1.40 |
| IMAGE:28469 | Hs.177584 | 3-oxoacid CoA transferase | OXCT | 1.39 |
| IMAGE:489680 | Hs.278411 | NCK-associated protein 1 | NCKAP1 | 1.39 |
| IMAGE:251452 | Hs.172788 | ALEX3 protein | ALEX3 | 1.38 |
| IMAGE:842861 | Hs.15265 | heterogeneous nuclear ribonucleoprotein R | HNRPR | 1.38 |
| IMAGE:504226 | Hs.443057 | CD53 antigen | CD53 | 1.38 |
| IMAGE:878713 | Hs.26267 | torsin family 3. member A | TOR3A | 1.38 |
| IMAGE:1739650 | Hs.436152 | TGF beta-inducible nuclear protein 1 | TINP1 | 1.37 |
| IMAGE:45556 | Hs.437625 | MAP/microtubule affinity-regulating kinase 3 | MARK3 | 1.37 |
| IMAGE:562101 | Hs.133411 | hect (homologous to the E6-AP (UBE3A) carboxyl terminus) domain and RCC1 (CHC1)-like domain (RLD) 1 | HERC1 | 1.37 |
| IMAGE:629498 | Hs.65818 | NADH dehydrogenase (ubiquinone) 1 alpha subcomplex, 10, 42kDa | NDUFA10 | 1.36 |
| IMAGE:810753 | Hs.380887 | mitochondrial ribosomal protein S10 | MRPS10 | 1.36 |
| IMAGE:2542182 | Hs.416211 | chaperonin containing TCP1. subunit 8 (theta) | CCT8 | 1.36 |
| IMAGE:121489 | Hs.250773 | signal sequence receptor. alpha (translocon-associated protein alpha) | SSR1 | 1.36 |
| IMAGE:201282 | Hs.308809 | chromosome 1 open reading frame 22 | C1orf22 | 1.36 |
| IMAGE:545423 | Hs.404336 | hypothetical protein BC008217 | LOC92906 | 1.36 |
| IMAGE:80071 | Hs.126550 | vacuolar protein sorting 4B (yeast) | VPS4B | 1.35 |
| IMAGE:360547 | Hs.171937 | steroid dehydrogenase-like | LOC83693 | 1.35 |
| IMAGE:753381 | Hs.528298 | Sec23 homolog A (S. cerevisiae) | SEC23A | 1.34 |
| IMAGE:2184814 | Hs.109655 | sex comb on midleg-like 1 (Drosophila) | SCML1 | 1.34 |
| IMAGE:2461849 | Hs.389559 | eukaryotic translation initiation factor 3. subunit 10 theta. 150/170kDa | EIF3S10 | 1.34 |
| IMAGE:731344 | Hs.7055 | CDNA FLJ33420 fis. clone BRACE2020028 |  | 1.34 |
| IMAGE:810575 | Hs.57813 | zinc ribbon domain containing. 1 | ZNRD1 | 1.34 |
| IMAGE:121948 | Hs.7879 | interferon-related developmental regulator 1 | IFRD1 | 1.33 |
| IMAGE:1473300 | Hs.75860 | hydroxyacyl-Coenzyme A dehydrogenase/3-ketoacyl-Coenzyme A thiolase/enoyl-Coenzyme A hydratase (trifunctional protein). alpha subunit | HADHA | 1.33 |
| IMAGE:2577108 | Hs.405144 | splicing factor. arginine/serine-rich 3 | SFRS3 | 1.32 |
| IMAGE:563860 | Hs.177469 | Transcribed sequences |  | 1.32 |
| IMAGE:785392 | Hs.377974 | DKFZP434F2021 protein | DKFZP434F2021 | 1.30 |
| IMAGE:144862 | Hs.278391 | TRIF-related adaptor molecule | TIRP | 1.30 |
| IMAGE:745144 | Hs.72927 | interleukin 7 | IL7 | 1.29 |
| IMAGE:809938 | Hs.23582 | tumor-associated calcium signal transducer 2 | TACSTD2 | 1.29 |
| IMAGE:139009 | Hs.418138 | fibronectin 1 | FN1 | 1.28 |
| IMAGE:143661 | Hs.102541 | netrin 4 | NTN4 | 1.28 |
| IMAGE:884894 | Hs.151777 | eukaryotic translation initiation factor 2. subunit 1 alpha. 35kDa | EIF2S1 | 1.27 |
| IMAGE:269748 | Hs.7471 | BBP-like protein 1 | BLP1 | 1.27 |
| IMAGE:1693245 | Hs.146724 | Transcribed sequences |  | 1.26 |
| IMAGE:757147 | Hs.181195 | DnaJ (Hsp40) homolog. subfamily B. member 6 | DNAJB6 | 1.26 |
| IMAGE:245885 | Hs.374609 | hypothetical protein DKFZp434K1421 | DKFZP434K1421 | 1.25 |
| IMAGE:1573779 | Hs.211068 | hypothetical protein MGC33190 | MGC33190 | 1.24 |
| IMAGE:383881 | Hs.21015 | hippocampus abundant transcript 1 | HIAT1 | 1.24 |
| IMAGE:1588349 | Hs.378857 | hypothetical protein FLJ20421 | FLJ20421 | 1.23 |
| IMAGE:131016 | Hs.365655 | RAB8B. member RAS oncogene family | RAB8B | 1.22 |
| IMAGE:377048 | Hs.121576 | myosin IB | MYO1B | 1.21 |
| IMAGE:595420 | Hs.437091 | enoyl Coenzyme A hydratase domain containing 1 | ECHDC1 | 1.20 |
| IMAGE:712482 | Hs.444529 | aprataxin | APTX | 1.20 |
| IMAGE:745114 | Hs.430300 | CDNA FLJ42432 fis. clone BLADE2006412 |  | 1.19 |
| IMAGE:1636148 | Hs.409430 | deoxyguanosine kinase | DGUOK | 1.18 |

Cluster 4 : Rosiglitazone and retinoic acid down regulated genes

| Clones | Unigene number | Name | Symbol | Ratio |
| --- | --- | --- | --- | --- |
| IMAGE:153830 | Hs.239758 | acetoacetyl-CoA synthetase | AACS | 0.41 |
| IMAGE:2566856 | Hs.118400 | fascin homolog 1, actin-bundling protein (Strongylocentrotus purpuratus) | FSCN1 | 0.43 |
| IMAGE:506497 | Hs.325650 | EH-domain containing 2 | EHD2 | 0.49 |
| IMAGE:800185 | Hs.521967 | Transcribed sequence with weak similarity to protein ref:NP_060312,1 (H,sapiens) hypothetical protein FLJ20489 [Homo sapiens] |  | 0.51 |
| IMAGE:770087 | Hs.104881 | Transcribed sequences |  | 0.55 |
| IMAGE:450938 | Hs.288771 | DKFZP586A0522 protein | DKFZP586A0522 | 0.56 |
| IMAGE:1557290 | Hs.115830 | heparan sulfate (glucosamine) 3-O-sulfotransferase 2 | HS3ST2 | 0.57 |
| IMAGE:743058 | Hs.98007 | Transcribed sequences |  | 0.58 |
| IMAGE:731476 | Hs.98123 | hypothetical protein MGC35043 | MGC35043 | 0.59 |
| IMAGE:588015 | Hs.171971 | Transcribed sequences |  | 0.59 |
| IMAGE:286545 | Hs.162852 | hook homolog 3 (Drosophila) | HOOK3 | 0.59 |
| IMAGE:704420 | Hs.369815 | natural killer-tumor recognition sequence | NKTR | 0.59 |
| IMAGE:212496 | Hs.439599 | mannosidase, alpha, class 2A, member 1 | MAN2A1 | 0.59 |
| IMAGE:358887 | Hs.77171 | MCM5 minichromosome maintenance deficient 5, cell division cycle 46 (S, cerevisiae) | MCM5 | 0.60 |
| IMAGE:809894 | Hs.14779 | acetyl-Coenzyme A synthetase 2 (ADP forming) | ACAS2 | 0.61 |
| IMAGE:1520525 | Hs.130204 | Transcribed sequences |  | 0.62 |
| IMAGE:1683418 | Hs.135890 | PHD finger protein 12 | PHF12 | 0.62 |
| IMAGE:2075777 | Hs.5394 | myosin IA | MYO1A | 0.62 |
| IMAGE:488370 | Hs.443625 | collagen, type III, alpha 1 (Ehlers-Danlos syndrome type IV, autosomal dominant) | COL3A1 | 0.62 |
| IMAGE:811048 | Hs.301685 | plexin D1 | PLXND1 | 0.62 |
| IMAGE:85840 | Hs.364345 | nicotinamide N-methyltransferase | NNMT | 0.63 |
| IMAGE:841059 | Hs.82422 | capping protein (actin filament), gelsolin-like | CAPG | 0.63 |
| IMAGE:2315876 | Hs.405479 | tryptase, alpha | TPS1 | 0.63 |
| IMAGE:345553 | Hs.65424 | tetranectin (plasminogen binding protein) | TNA | 0.63 |
| IMAGE:1896346 | Hs.152128 | Transcribed sequences |  | 0.64 |
| IMAGE:290566 | Hs.116796 | DIX domain containing 1 | DIXDC1 | 0.64 |
| IMAGE:839592 | Hs.343522 | ATPase, Ca++ transporting, plasma membrane 4 | ATP2B4 | 0.64 |
| IMAGE:1592837 | Hs.174195 | interferon induced transmembrane protein 2 (1-8D) | IFITM2 | 0.64 |
| IMAGE:301400 | Hs.85050 | phospholamban | PLN | 0.64 |
| IMAGE:2315984 | Hs.101674 | arylsulfatase F | ARSF | 0.64 |
| IMAGE:1870305 | Hs.78846 | heat shock 27kDa protein 2 | HSPB2 | 0.64 |
| IMAGE:510083 | Hs.136046 | Transcribed sequence with weak similarity to protein ref:NP_060190,1 (H,sapiens) hypothetical protein FLJ20234 [Homo sapiens] |  | 0.64 |
| IMAGE:590323 | Hs.435800 | vimentin | VIM | 0.64 |
| IMAGE:310054 | Hs.33024 | CDNA FLJ42259 fis, clone TKIDN2011289 |  | 0.65 |
| IMAGE:450776 | Hs.372082 | Transcribed sequences |  | 0.65 |
| IMAGE:233380 | Hs.443402 | Similar to Myosin-binding protein H (MyBP-H) (H-protein) (LOC343263), mRNA |  | 0.65 |
| IMAGE:1522523 | Hs.130180 | Transcribed sequences |  | 0.65 |
| IMAGE:743426 | Hs.22975 | KIAA1576 protein | KIAA1576 | 0.66 |
| IMAGE:1220457 | Hs.209452 | Transcribed sequences |  | 0.66 |
| IMAGE:265645 | Hs.42151 | histamine N-methyltransferase | HNMT | 0.66 |
| IMAGE:285260 | Hs.125478 | hypothetical protein FLJ10876 | FLJ10876 | 0.66 |
| IMAGE:840493 | Hs.78224 | ribonuclease, RNase A family, 1 (pancreatic) | RNASE1 | 0.66 |
| IMAGE:705064 | Hs.104019 | transforming, acidic coiled-coil containing protein 3 | TACC3 | 0.66 |
| IMAGE:154173 | Hs.235368 | collagen, type V, alpha 3 | COL5A3 | 0.66 |
| IMAGE:978964 | Hs.205742 | Transcribed sequences |  | 0.66 |
| IMAGE:868555 | Hs.136788 | Transcribed sequences |  | 0.67 |
| IMAGE:2273418 | Hs.66163 | Clone 23636 mRNA sequence |  | 0.67 |
| IMAGE:926077 | Hs.517060 | Transcribed sequence with weak similarity to protein ref:NP_056970,1 (H,sapiens) protease inhibitor 15 preproprotein; 25 kDa trypsin inhibitor [Homo sapiens] |  | 0.67 |
| IMAGE:730100 | Hs.365809 | Transcribed sequences |  | 0.67 |
| IMAGE:511718 | Hs.446658 | ALL1 fused gene from 5q31 | AF5Q31 | 0.67 |
| IMAGE:796129 | Hs.91567 | CDNA FLJ46122 fis, clone TESTI2039732 |  | 0.67 |
| IMAGE:1521686 | Hs.128128 | Transcribed sequences |  | 0.67 |
| IMAGE:290391 | Hs.146317 | Transcribed sequence with weak similarity to protein ref:NP_055301,1 (H,sapiens) neuronal thread protein [Homo sapiens] |  | 0.67 |
| IMAGE:34140 | Hs.377894 | grancalcin, EF-hand calcium binding protein | GCA | 0.68 |
| IMAGE:135713 | Hs.187471 | cytochrome P450, family 19, subfamily A, polypeptide 1 | CYP19A1 | 0.68 |
| IMAGE:840614 | Hs.438827 | leucyl/cystinyl aminopeptidase | LNPEP | 0.68 |
| IMAGE:1894453 | Hs.150001 | Transcribed sequences |  | 0.68 |
| IMAGE:257003 | Hs.387787 | killer cell lectin-like receptor subfamily K, member 1 | KLRK1 | 0.68 |
| IMAGE:1670583 | Hs.134974 | Transcribed sequences |  | 0.68 |
| IMAGE:68504 | Hs.280226 | apolipoprotein B (including Ag(x) antigen) | APOB | 0.68 |
| IMAGE:731292 | Hs.4055 | MRNA; cDNA DKFZp564C2063 (from clone DKFZp564C2063) |  | 0.68 |
| IMAGE:2365853 | Hs.528693 | RAS protein activator like 1 (GAP1 like) | RASAL1 | 0.68 |
| IMAGE:299182 | Hs.49889 | MRNA; cDNA DKFZp686J06116 (from clone DKFZp686J06116) |  | 0.68 |
| IMAGE:1950691 | Hs.55150 | hypothetical protein MGC26610 | MGC26610 | 0.68 |
| IMAGE:1076081 | Hs.160208 | SET domain-containing protein 7 | SET7 | 0.68 |
| IMAGE:46453 | Hs.388278 | Similar to embryonic blastocoelar extracellular matrix protein precursor (LOC166752), mRNA |  | 0.68 |
| IMAGE:684835 | Hs.432665 | Transcribed sequence with strong similarity to protein pdb:1BGM (E, coli) O Chain O, Beta-Galactosidase |  | 0.68 |
| IMAGE:595265 | Hs.470176 | Transcribed sequences |  | 0.69 |
| IMAGE:810504 | Hs.77422 | proteolipid protein 2 (colonic epithelium-enriched) | PLP2 | 0.69 |
| IMAGE:511768 | Hs.377402 | thiopurine S-methyltransferase | TPMT | 0.69 |
| IMAGE:1685642 | Hs.2868 | peripheral myelin protein 2 | PMP2 | 0.69 |
| IMAGE:489631 | Hs.434488 | chondroitin sulfate proteoglycan 2 (versican) | CSPG2 | 0.69 |
| IMAGE:366481 | Hs.432677 | keratin 6B | KRT6B | 0.69 |
| IMAGE:32515 | Hs.22571 | Transcribed locus, strongly similar to XP_377761.2 PREDICTED: similar to ribosomal protein L22 [Homo sapiens] |  | 0.70 |
| IMAGE:51081 | Hs.137218 | Transcribed locus, weakly similar to XP_498452.1 PREDICTED: hypothetical protein XP_498452 [Homo sapiens]Transcribed sequences |  | 0.70 |
| IMAGE:2419544 | Hs.102876 | pancreatic lipase | PNLIP | 0.70 |
| IMAGE:744367 | Hs.112949 | chromosome 1 open reading frame 34 | C1orf34 | 0.70 |
| IMAGE:840697 | Hs.497972 | FK506 binding protein 9, 63 kDa | FKBP9 | 0.70 |
| IMAGE:451470 | Hs.523712 | Transcribed sequence with moderate similarity to protein sp:P39188 (H,sapiens) ALU1_HUMAN Alu subfamily J sequence contamination warning entry |  | 0.70 |
| IMAGE:2543381 | Hs.283477 | CD99 antigen | CD99 | 0.70 |
| IMAGE:701602 | Hs.444651 | Transcribed sequences |  | 0.70 |
| IMAGE:187601 | Hs.260555 | chromosome 14 open reading frame 45 | C14orf45 | 0.70 |
| IMAGE:32921 | Hs.274539 | Clone 24481 mRNA sequence |  | 0.70 |
| IMAGE:320871 | Hs.280388 | nephronophthisis 1 (juvenile) | NPHP1 | 0.70 |
| IMAGE:565724 | Hs.388651 | Transcribed sequences |  | 0.70 |
| IMAGE:1909326 | Hs.150793 | Chromogranin A (parathyroid secretory protein 1) | CHGA | 0.70 |
| IMAGE:1915776 | Hs.152662 | Transcribed sequences |  | 0.70 |
| IMAGE:844881 | Hs.107000 | WD repeat domain 33 | WDR33 | 0.70 |
| IMAGE:1322605 | Hs.304474 | Transcribed sequences |  | 0.70 |
| IMAGE:240966 | Hs.132977 | poly(rC) binding protein 2 | PCBP2 | 0.70 |
| IMAGE:282741 | Hs.371965 | Transcribed sequence with weak similarity to protein ref:NP_071385,1 (H,sapiens) hypothetical protein FLJ20958 [Homo sapiens] |  | 0.70 |
| IMAGE:1896116 | Hs.444579 | Transcribed sequences |  | 0.70 |
| IMAGE:1706610 | Hs.310512 | chemokine (C-C motif) receptor-like 1 | CCRL1 | 0.71 |
| IMAGE:51997 | Hs.135894 | Hypothetical LOC389422 | RP11-487F23.3 | 0.71 |
| IMAGE:287261 | Hs.439767 | thymus high mobility group box protein TOX | TOX | 0.71 |
| IMAGE:1877200 | Hs.34656 | Cysteine-rich hydrophobic domain 1 | CHIC1 | 0.71 |
| IMAGE:745772 | Hs.255462 | microseminoprotein, beta- | MSMB | 0.71 |
| IMAGE:1900077 | Hs.504085 | Transcribed sequence with moderate similarity to protein ref:NP_055301,1 (H,sapiens) neuronal thread protein [Homo sapiens] |  | 0.71 |
| IMAGE:1557654 | Hs.127146 | CDNA FLJ39997 fis, clone STOMA2002367 |  | 0.71 |
| IMAGE:345132 | Hs.444882 | hypothetical protein FLJ25471 | FLJ25471 | 0.71 |
| IMAGE:1156291 | Hs.157818 | potassium voltage-gated channel, shaker-related subfamily, beta member 1 | KCNAB1 | 0.71 |
| IMAGE:427838 | Hs.380412 | RNA (guanine-9-) methyltransferase domain containing 2 | RG9MTD2 | 0.71 |
| IMAGE:1881469 | Hs.171952 | occludin | OCLN | 0.71 |
| IMAGE:810983 | Hs.17936 | DKFZP434H132 protein | DKFZP434H132 | 0.71 |
| IMAGE:1875564 | Hs.387725 | integrin, alpha 2 (CD49B, alpha 2 subunit of VLA-2 receptor) | ITGA2 | 0.71 |
| IMAGE:307211 | Hs.118228 | Transcribed sequences |  | 0.71 |
| IMAGE:857612 | Hs.351558 | hypothetical protein FLJ32389 | FLJ32389 | 0.71 |
| IMAGE:261664 | Hs.200022 | Clone IMAGE:5285814, mRNA |  | 0.71 |
| IMAGE:1593829 | Hs.391858 | TIA1 cytotoxic granule-associated RNA binding protein | TIA1 | 0.71 |
| IMAGE:1608925 | Hs.31293 | RNA (guanine-9-) methyltransferase domain containing 3 | RG9MTD3 | 0.71 |
| IMAGE:1636226 | Hs.135787 | Sal-like 1 (Drosophila) | SALL1 | 0.71 |
| IMAGE:1457425 | Hs.529878 | Transcribed sequences |  | 0.71 |
| IMAGE:1519127 | Hs.369462 | Hypothetical protein LOC644753 | LOC644753 | 0.71 |
| IMAGE:320380 | Hs.102971 | asparagine-linked glycosylation 10 homolog (yeast, alpha-1,2-glucosyltransferase) | ALG10 | 0.71 |
| IMAGE:283444 | Hs.17211 | dedicator of cytokinesis 2 | DOCK2 | 0.71 |
| IMAGE:362424 | Hs.438914 | Transcribed locus, strongly similar to XP_516060.1 PREDICTED: similar to KIAA1843 protein [Pan troglodytes] |  | 0.72 |
| IMAGE:131104 | Hs.326725 | FLJ22624 protein | FLJ22624 | 0.72 |
| IMAGE:730917 | Hs.16470 | hypothetical protein FLJ10904 | FLJ10904 | 0.72 |
| IMAGE:1691369 | Hs.282466 | dedicator of cytokinesis 5 | DOCK5 | 0.72 |
| IMAGE:286661 | Hs.90250 | CDNA FLJ36413 fis, clone THYMU2010816 |  | 0.72 |
| IMAGE:2015997 | Hs.368996 | relaxin 1 (H1) | RLN1 | 0.72 |
| IMAGE:950594 | Hs.445835 | SERTA domain containing 4 | SERTAD4 | 0.72 |
| IMAGE:1643514 | Hs.289049 | lipoprotein, Lp(a)-like 2 | LPAL2 | 0.72 |
| IMAGE:1466628 | Hs.163914 | hypothetical protein DKFZp313G1735 | DKFZp313G1735 | 0.72 |
| IMAGE:269185 | Hs.343588 | Similar to protein of fungal metazoan origin like (11,1 kD) (2C514) (LOC388600), mRNA |  | 0.72 |
| IMAGE:1543974 | Hs.132868 | Ubiquitin specific peptidase 32 | USP32 | 0.72 |
| IMAGE:1461168 | Hs.388565 | MRNA; cDNA DKFZp686C13222 (from clone DKFZp686C13222) |  | 0.72 |
| IMAGE:1908980 | Hs.150150 | CDNA FLJ40481 fis, clone TESTI2043477 |  | 0.72 |
| IMAGE:951570 | Hs.408177 | ADP-ribosylation factor guanine nucleotide factor 6 | EFA6R | 0.72 |
| IMAGE:594850 | Hs.49344 | mucolipin 3 | MCOLN3 | 0.72 |
| IMAGE:137254 | Hs.368746 | neuropilin 2 | NRP2 | 0.72 |
| IMAGE:684216 | Hs.189829 | eukaryotic translation initiation factor 2C, 3 | EIF2C3 | 0.72 |
| IMAGE:310138 | Hs.44481 | forkhead box F2 | FOXF2 | 0.72 |
| IMAGE:1695088 | Hs.388289 | potassium voltage-gated channel, KQT-like subfamily, member 3 | KCNQ3 | 0.72 |
| IMAGE:123089 | Hs.410088 | suppressor of Ty 3 homolog (S, cerevisiae) | SUPT3H | 0.72 |
| IMAGE:745531 | Hs.377120 | Transcribed sequences |  | 0.72 |
| IMAGE:320764 | Hs.190399 | Full length insert cDNA clone ZB97E03 |  | 0.73 |
| IMAGE:916021 | Hs.105944 | LOC389556 (LOC389556), mRNA |  | 0.73 |
| IMAGE:759948 | Hs.422181 | S100 calcium binding protein, beta (neural) | S100B | 0.73 |
| IMAGE:949938 | Hs.304682 | cystatin C (amyloid angiopathy and cerebral hemorrhage) | CST3 | 0.73 |
| IMAGE:840788 | Hs.446574 | thymosin, beta 10 | TMSB10 | 0.73 |
| IMAGE:1704727 | Hs.135536 | Transcribed sequences |  | 0.73 |
| IMAGE:321905 | Hs.55080 | solute carrier family 25 (mitochondrial oxodicarboxylate carrier), member 21 | SLC25A21 | 0.73 |
| IMAGE:1855896 | Hs.240951 | naked cuticle homolog 2 (Drosophila) | NKD2 | 0.73 |
| IMAGE:773402 | Hs.22488 | Similar to Zinc finger protein 264 | LOC390980 | 0.73 |
| IMAGE:810873 | Hs.446415 | sodium channel, nonvoltage-gated 1 alpha | SCNN1A | 0.73 |
| IMAGE:268877 | Hs.43725 | CDNA FLJ41592 fis, clone CTONG2022601 |  | 0.73 |
| IMAGE:754479 | Hs.389724 | chromosome 1 open reading frame 29 | C1orf29 | 0.73 |
| IMAGE:298189 | Hs.171806 | Transcribed sequence with strong similarity to protein sp:P14651 (H,sapiens) HXB3_HUMAN Homeobox protein Hox-B3 |  | 0.73 |
| IMAGE:753069 | Hs.306178 | c-mer proto-oncogene tyrosine kinase | MERTK | 0.73 |
| IMAGE:726721 | Hs.445808 | rhabdoid tumor deletion region gene 1 | RTDR1 | 0.73 |
| IMAGE:2018700 | Hs.28088 | SGC32445 protein | LOC51308 | 0.73 |
| IMAGE:416769 | Hs.235484 | Transcribed sequence with weak similarity to protein ref:NP_060312,1 (H,sapiens) hypothetical protein FLJ20489 [Homo sapiens] |  | 0.73 |
| IMAGE:39885 | Hs.497208 | DBCCR1-like | DBCCR1L | 0.73 |
| IMAGE:729962 | Hs.98163 | Transcribed sequences |  | 0.73 |
| IMAGE:1896918 | Hs.150050 | CDNA FLJ39245 fis, clone OCBBF2008366 |  | 0.73 |
| IMAGE:1461059 | Hs.269683 | Transcribed sequences |  | 0.73 |
| IMAGE:1519951 | Hs.43697 | ets variant gene 5 (ets-related molecule) | ETV5 | 0.73 |
| IMAGE:1456776 | Hs.5372 | claudin 4 | CLDN4 | 0.73 |
| IMAGE:141171 | Hs.512633 | proteoglycan 2, bone marrow (natural killer cell activator, eosinophil granule major basic protein) | PRG2 | 0.73 |
| IMAGE:301067 | Hs.508917 | Heterogeneous nuclear ribonucleoprotein A0 | HNRPA0 | 0.73 |
| IMAGE:341095 | Hs.103118 | Transcribed sequences |  | 0.73 |
| IMAGE:759173 | Hs.154084 | phosphorylase, glycogen; muscle (McArdle syndrome, glycogen storage disease type V) | PYGM | 0.73 |
| IMAGE:1836709 | Hs.147218 | Transcribed sequences |  | 0.73 |
| IMAGE:1656170 | Hs.21668 | Transcribed sequences |  | 0.74 |
| IMAGE:1751142 | Hs.147948 | Transcribed sequences |  | 0.74 |
| IMAGE:1031185 | Hs.111850 | mitochondrial capsule selenoprotein | MCSP | 0.74 |
| IMAGE:755368 | Hs.30868 | reticulon 4 receptor | RTN4R | 0.74 |
| IMAGE:1467686 | Hs.156997 | Transcribed sequences |  | 0.74 |
| IMAGE:417743 | Hs.149252 | Transcribed sequences |  | 0.74 |
| IMAGE:266094 | Hs.435124 | topoisomerase (DNA) III alpha | TOP3A | 0.74 |
| IMAGE:968544 | Hs.136401 | Transcribed sequences |  | 0.74 |
| IMAGE:1526035 | Hs.440835 | splicing factor 1 | SF1 | 0.74 |
| IMAGE:1460401 | Hs.292009 | Clone IMAGE:4838482, mRNA |  | 0.74 |
| IMAGE:143227 | Hs.9645 | tankyrase 1 binding protein 1, 182kDa | TNKS1BP1 | 0.74 |
| IMAGE:136225 | Hs.414467 | homeo box A13 | HOXA13 | 0.74 |
| IMAGE:1557365 | Hs.443624 | Transcribed sequences |  | 0.74 |
| IMAGE:1659382 | Hs.355398 | hypothetical protein MGC10204 | MGC10204 | 0.74 |
| IMAGE:1591076 | Hs.113503 | karyopherin (importin) beta 3 | KPNB3 | 0.74 |
| IMAGE:731047 | Hs.104830 | hypothetical protein LOC93273 | LOC93273 | 0.74 |
| IMAGE:1325816 | Hs.441072 | polymerase (RNA) II (DNA directed) polypeptide L, 7,6kDa | POLR2L | 0.74 |
| IMAGE:744005 | Hs.116296 | Transcribed sequences |  | 0.74 |
| IMAGE:251937 | Hs.42192 | Transcribed sequences |  | 0.74 |
| IMAGE:1073719 | Hs.353191 | hypothetical protein FLJ20657 | NPL4 | 0.74 |
| IMAGE:1626129 | Hs.445048 | CDNA FLJ26091 fis, clone RCT06468 |  | 0.75 |
| IMAGE:266312 | Hs.84999 | ATPase, Cu++ transporting, beta polypeptide (Wilson disease) | ATP7B | 0.75 |
| IMAGE:1055762 | Hs.203963 | helicase, lymphoid-specific | HELLS | 0.75 |
| IMAGE:1836771 | Hs.501262 | CDNA FLJ44910 fis, clone BRAMY3008436 |  | 0.75 |
| IMAGE:140792 | Hs.28700 | hypothetical protein LOC115749 | LOC115749 | 0.75 |
| IMAGE:137224 | Hs.358360 | Transcribed sequences |  | 0.75 |
| IMAGE:1942549 | Hs.272243 | calcium channel, voltage-dependent, L type, alpha 1C subunit | CACNA1C | 0.75 |
| IMAGE:357778 | Hs.271953 | sestrin 3 | SESN3 | 0.75 |
| IMAGE:284175 | Hs.328109 | vacuolar protein sorting 13C (yeast) | VPS13C | 0.75 |
| IMAGE:1751404 | Hs.17681 | toll-interleukin 1 receptor (TIR) domain containing adaptor protein | TIRAP | 0.75 |
| IMAGE:257436 | Hs.116532 | hypothetical protein FLJ20344 | FLJ20344 | 0.75 |
| IMAGE:1561989 | Hs.124327 | Transcribed sequences |  | 0.75 |
| IMAGE:1911901 | Hs.124638 | Transcribed sequences |  | 0.75 |
| IMAGE:283686 | Hs.102679 | CDNA FLJ34358 fis, clone FEBRA2013905 |  | 0.75 |
| IMAGE:1087377 | Hs.156289 | cholinergic receptor, nicotinic, delta polypeptide | CHRND | 0.75 |
| IMAGE:360436 | Hs.285313 | core promoter element binding protein | COPEB | 0.75 |
| IMAGE:1468560 | Hs.440387 | erythrocyte membrane protein band 4,1-like 2 | EPB41L2 | 0.75 |
| IMAGE:23443 | Hs.12365 | synaptotagmin XIII | SYT13 | 0.75 |
| IMAGE:251529 | Hs.7104 | Kruppel-like factor 13 | KLF13 | 0.75 |
| IMAGE:322441 | Hs.227098 | glial cells missing homolog 2 (Drosophila) | GCM2 | 0.75 |
| IMAGE:768508 | Hs.317659 | developmental pluripotency associated 4 | DPPA4 | 0.75 |
| IMAGE:214331 | Hs.381048 | Transcribed sequences |  | 0.76 |
| IMAGE:267738 | Hs.380971 | chromosome 1 open reading frame 27 | C1orf27 | 0.76 |
| IMAGE:433522 | Hs.146239 | Similar to Lysophospholipase | LOC374569 | 0.76 |
| IMAGE:1850385 | Hs.36908 | activating transcription factor 1 | ATF1 | 0.76 |
| IMAGE:1467309 | Hs.278675 | bromodomain containing 4 | BRD4 | 0.76 |
| IMAGE:415654 | Hs.446297 | zinc finger protein 498 | ZNF498 | 0.76 |
| IMAGE:376644 | Hs.372000 | neutral sphingomyelinase (N-SMase) activation associated factor | NSMAF | 0.76 |
| IMAGE:51951 | Hs.6526 | Transcribed sequences |  | 0.76 |
| IMAGE:843126 | Hs.502773 | SIPL protein | SIPL | 0.76 |
| IMAGE:503126 | Hs.458447 | MRNA; cDNA DKFZp586N1918 (from clone DKFZp586N1918) |  | 0.76 |
| IMAGE:309119 | Hs.55185 | Transcribed sequences |  | 0.76 |
| IMAGE:282838 | Hs.34871 | zinc finger homeobox 1b | ZFHX1B | 0.76 |
| IMAGE:1671580 | Hs.210532 | KIAA0141 gene product | KIAA0141 | 0.76 |
| IMAGE:79622 | Hs.11025 | Transcribed sequences |  | 0.76 |
| IMAGE:925930 | Hs.105830 | Transcribed sequences |  | 0.76 |
| IMAGE:1588809 | Hs.81988 | disabled homolog 2, mitogen-responsive phosphoprotein (Drosophila) | DAB2 | 0.76 |
| IMAGE:2168378 | Hs.398085 | serine hydrolase-like | SERHL | 0.76 |
| IMAGE:809573 | Hs.359535 | Transcribed sequences |  | 0.76 |
| IMAGE:1585254 | Hs.24715 | SH3 domain protein D19 | DKFZp434D0215 | 0.76 |
| IMAGE:714083 | Hs.411958 | major histocompatibility complex, class I, F | HLA-F | 0.76 |
| IMAGE:1892724 | Hs.145993 | Transcribed sequences |  | 0.76 |
| IMAGE:1493113 | Hs.380065 | Transcribed sequence with moderate similarity to protein ref:NP_003909,1 (H,sapiens) glycogenin 2 [Homo sapiens] |  | 0.76 |
| IMAGE:2137957 | Hs.400432 | zinc finger protein 237 | ZNF237 | 0.76 |
| IMAGE:1460498 | Hs.511669 | Clone IMAGE:5271578, mRNA |  | 0.76 |
| IMAGE:771294 | Hs.446583 | Transcribed sequence with weak similarity to protein pir:I60307 (E, coli) I60307 beta-galactosidase, alpha peptide - Escherichia coli |  | 0.76 |
| IMAGE:1621809 | Hs.125904 | LOC401058 (LOC401058), mRNA |  | 0.76 |
| IMAGE:284584 | Hs.48388 | Transcribed sequences |  | 0.76 |
| IMAGE:1744624 | Hs.147198 | Transcribed sequence |  | 0.77 |
| IMAGE:399270 | Hs.8881 | CDNA FLJ32163 fis, clone PLACE6000371 |  | 0.77 |
| IMAGE:290213 | Hs.331904 | calcium channel, voltage-dependent, gamma subunit 4 | CACNG4 | 0.77 |
| IMAGE:1460075 | Hs.386532 | ubiquitin-like 5 | UBL5 | 0.77 |
| IMAGE:1584260 | Hs.168132 | Interleukin 15 | IL15 | 0.77 |
| IMAGE:897551 | Hs.131374 | Transcribed sequences |  | 0.77 |
| IMAGE:825232 | Hs.368950 | MADS box transcription enhancer factor 2, polypeptide C (myocyte enhancer factor 2C) | MEF2C | 0.77 |
| IMAGE:1891842 | Hs.22905 | hypothetical protein FLJ30058 | FLJ30058 | 0.77 |
| IMAGE:1916769 | Hs.156667 | KIAA1536 protein | KIAA1536 | 0.77 |
| IMAGE:1562194 | Hs.127566 | Transcribed sequences |  | 0.77 |
| IMAGE:430763 | Hs.6522 | elongation factor for selenoprotein translation | SELB | 0.77 |
| IMAGE:745336 | Hs.136557 | solute carrier family 6 (neurotransmitter transporter, glycine), member 5 | SLC6A5 | 0.77 |
| IMAGE:1638479 | Hs.21838 | zinc finger protein 415 | ZNF415 | 0.77 |
| IMAGE:1640895 | Hs.125439 | Transcribed sequences |  | 0.77 |
| IMAGE:1902796 | Hs.430589 | Transcribed sequence with weak similarity to protein sp:P08547 (H,sapiens) LIN1_HUMAN LINE-1 REVERSE TRANSCRIPTASE HOMOLOG |  | 0.77 |
| IMAGE:757158 | Hs.115474 | replication factor C (activator 1) 3, 38kDa | RFC3 | 0.77 |
| IMAGE:487333 | Hs.310960 | hypothetical protein FLJ21839 | FLJ21839 | 0.77 |
| IMAGE:22040 | Hs.151738 | matrix metalloproteinase 9 (gelatinase B, 92kDa gelatinase, 92kDa type IV collagenase) | MMP9 | 0.77 |
| IMAGE:1543817 | Hs.503210 | Hypothetical gene supported by AL832565 (LOC400955), mRNA |  | 0.77 |
| IMAGE:1914822 | Hs.335052 | Transcribed sequence with weak similarity to protein ref:NP_060312,1 (H,sapiens) hypothetical protein FLJ20489 [Homo sapiens] |  | 0.78 |
| IMAGE:739207 | Hs.416216 | dual specificity phosphatase 12 | DUSP12 | 0.78 |
| IMAGE:2274272 | Hs.512828 | zinc finger protein 506 | ZNF506 | 0.78 |
| IMAGE:730942 | Hs.15898 | 2,4-dienoyl CoA reductase 2, peroxisomal | DECR2 | 0.78 |
| IMAGE:490043 | Hs.103718 | Transcribed sequences |  | 0.78 |
| IMAGE:1895748 | Hs.144287 | hairy/enhancer-of-split related with YRPW motif 2 | HEY2 | 0.78 |
| IMAGE:194949 | Hs.308638 | cytochrome P450, family 3, subfamily A, polypeptide 7 | CYP3A7 | 0.78 |
| IMAGE:142579 | Hs.144519 | T-cell leukemia/lymphoma 6 | TCL6 | 0.78 |
| IMAGE:32683 | Hs.100912 | CDNA: FLJ22726 fis, clone HSI15005 |  | 0.78 |
| IMAGE:1631290 | Hs.124370 | chromosome 6 open reading frame 199 | C6orf199 | 0.78 |
| IMAGE:344108 | Hs.190090 | Hypothetical protein LOC148189, mRNA (cDNA clone IMAGE:4798281), partial cds |  | 0.78 |
| IMAGE:745090 | Hs.445826 | hypothetical protein FLJ23033 | FLJ23033 | 0.78 |
| IMAGE:1743991 | Hs.128166 | CDNA FLJ32992 fis, clone THYMU1000098 |  | 0.78 |
| IMAGE:1658859 | Hs.104744 | hypothetical protein DKFZp434J0617 | DKFZp434J0617 | 0.78 |
| IMAGE:322024 | Hs.388208 | bromodomain adjacent to zinc finger domain, 2B | BAZ2B | 0.78 |
| IMAGE:138550 | Hs.24545 | zinc finger protein 444 | ZNF444 | 0.78 |
| IMAGE:1899498 | Hs.143838 | Transcribed sequence with weak similarity to protein pir:F41925 (H,sapiens) F41925 hypothetical protein 2 - human |  | 0.78 |
| IMAGE:1606916 | Hs.129613 | Transcribed sequences |  | 0.78 |
| IMAGE:259627 | Hs.415592 | KIAA1126 protein | KIAA1126 | 0.78 |
| IMAGE:489866 | Hs.261314 | Transcribed sequences |  | 0.78 |
| IMAGE:1872234 | Hs.253236 | Fanconi anemia, complementation group C | FANCC | 0.78 |
| IMAGE:1069345 | Hs.433040 | Transcribed sequence with weak similarity to protein sp:P39188 (H,sapiens) ALU1_HUMAN Alu subfamily J sequence contamination warning entry |  | 0.78 |
| IMAGE:381062 | Hs.59773 | Transcribed sequences |  | 0.78 |
| IMAGE:1466523 | Hs.125717 | Zinc finger protein 395 | ZNF395 | 0.79 |
| IMAGE:1758598 | Hs.489998 | LOC400104 (LOC387905), mRNA |  | 0.79 |
| IMAGE:810801 | Hs.273330 | agrin | AGRN | 0.79 |
| IMAGE:1642089 | Hs.376474 | hypothetical protein LOC286436 | LOC286436 | 0.79 |
| IMAGE:1751336 | Hs.153817 | Hypothetical LOC284859 (LOC284859), mRNA |  | 0.79 |
| IMAGE:1925496 | Hs.519574 | Apical protein 2 | APXL2 | 0.79 |
| IMAGE:781020 | Hs.104967 | LOC388701 (LOC388701), mRNA |  | 0.79 |
| IMAGE:251664 | Hs.42339 | Transcribed sequences |  | 0.79 |
| IMAGE:814616 | Hs.178499 | HSPC063 protein | HSPC063 | 0.79 |
| IMAGE:2325850 | Hs.517818 | Solute carrier family 6 (neurotransmitter transporter, taurine), member 6 | SLC6A6 | 0.79 |
| IMAGE:2163910 | Hs.169047 | chondroitin sulfate proteoglycan 3 (neurocan) | CSPG3 | 0.79 |
| IMAGE:1553289 | Hs.116364 | Hypothetical protein LOC285620, mRNA (cDNA clone IMAGE:5286379), partial cds |  | 0.79 |
| IMAGE:1668038 | Hs.349119 | CGI-90 protein | CGI-90 | 0.79 |
| IMAGE:1883028 | Hs.283522 | presenilin enhancer 2 | PEN2 | 0.79 |
| IMAGE:1914698 | Hs.388682 | CDNA FLJ31249 fis, clone KIDNE2005327 |  | 0.79 |
| IMAGE:810934 | Hs.252418 | elastin (supravalvular aortic stenosis, Williams-Beuren syndrome) | ELN | 0.79 |
| IMAGE:1058420 | Hs.368305 | progestin and adipoQ receptor family member III | PAQR3 | 0.79 |
| IMAGE:345152 | Hs.299883 | FAD104 | FAD104 | 0.79 |
| IMAGE:1636365 | Hs.129614 | kidney-specific membrane protein | NX17 | 0.79 |
| IMAGE:1475697 | Hs.132399 | mutS homolog 5 (E, coli) | MSH5 | 0.80 |
| IMAGE:1601979 | Hs.89649 | epoxide hydrolase 1, microsomal (xenobiotic) | EPHX1 | 0.80 |
| IMAGE:1661941 | Hs.458300 | TBC1 domain family, member 16 | TBC1D16 | 0.80 |
| IMAGE:743971 | Hs.524809 | Transcribed sequences |  | 0.80 |
| IMAGE:1868663 | Hs.145555 | Transcribed sequences |  | 0.80 |
| IMAGE:1031048 | Hs.512622 | hypothetical protein FLJ20309 | FLJ20309 | 0.80 |
| IMAGE:489089 | Hs.415997 | collagen, type VI, alpha 1 | COL6A1 | 0.80 |
| IMAGE:731061 | Hs.347713 | fms-related tyrosine kinase 1 (vascular endothelial growth factor/vascular permeability factor receptor) | FLT1 | 0.80 |
| IMAGE:453183 | Hs.301302 | vinexin beta (SH3-containing adaptor molecule-1) | SCAM-1 | 0.80 |
| IMAGE:1911663 | Hs.146159 | CDNA clone IMAGE:5259414, partial cds |  | 0.80 |
| IMAGE:345469 | Hs.134185 | thymus expressed gene 3-like | MGC15476 | 0.80 |
| IMAGE:858401 | Hs.22215 | secretogranin III | SCG3 | 0.80 |
| IMAGE:50141 | Hs.522682 | Transcribed sequence with strong similarity to protein ref:NP_061850,1 (H,sapiens) neuroligin 3 [Homo sapiens] |  | 0.80 |
| 1293009 | Hs.271511 | zinc finger protein 160 | ZNF160 | 0.80 |
| IMAGE:141671 | Hs.438794 | Charcot-Marie-Tooth neuropathy 4B2 (autosomal recessive, with myelin outfolding) | CMT4B2 | 0.80 |
| IMAGE:1694968 | Hs.196914 | minor histocompatibility antigen HA-1 | HA-1 | 0.80 |
| IMAGE:51585 | Hs.12787 | MRNA; cDNA DKFZp686L0740 (from clone DKFZp686L0740) |  | 0.80 |
| IMAGE:323938 | Hs.170399 | Ras association (RalGDS/AF-6) and pleckstrin homology domains 1 | RAPH1 | 0.80 |
| IMAGE:1518475 | Hs.150399 | Transcribed sequences |  | 0.80 |
| IMAGE:897829 | Hs.397542 | Transcribed sequences |  | 0.80 |
| IMAGE:344272 | Hs.9999 | epithelial membrane protein 3 | EMP3 | 0.80 |
| IMAGE:1751170 | Hs.153355 | quaking homolog, KH domain RNA binding (mouse) | QKI | 0.81 |
| IMAGE:1049284 | Hs.443695 | tumor differentially expressed 2-like | TDE2L | 0.81 |
| IMAGE:281545 | Hs.528628 | Similar to ORF2 (LOC392355), mRNA |  | 0.81 |
| IMAGE:51814 | Hs.444893 | Transcribed sequence with weak similarity to protein ref:NP_060265,1 (H,sapiens) hypothetical protein FLJ20378 [Homo sapiens] |  | 0.81 |
| IMAGE:773286 | Hs.396783 | solute carrier family 9 (sodium/hydrogen exchanger), isoform 3 regulatory factor 1 | SLC9A3R1 | 0.81 |
| IMAGE:1115772 | Hs.413208 | Transcribed sequence with weak similarity to protein ref:NP_060312,1 (H,sapiens) hypothetical protein FLJ20489 [Homo sapiens] |  | 0.81 |
| IMAGE:2028287 | Hs.145587 | Transcribed sequences |  | 0.81 |
| IMAGE:1573105 | Hs.128066 | hypothetical protein LOC254808 | LOC254808 | 0.81 |
| IMAGE:880630 | Hs.284135 | hypothetical protein MGC3036 | MGC3036 | 0.81 |
| IMAGE:1624213 | Hs.380159 | KIAA1393 | KIAA1393 | 0.81 |
| IMAGE:1620366 | Hs.399958 | Transcribed sequences |  | 0.81 |
| IMAGE:1670648 | Hs.134979 | Transcribed sequence with weak similarity to protein pir:S21976 (R,norvegicus) S21976 probable RNA-directed DNA polymerase |  | 0.82 |
| IMAGE:280291 | Hs.46794 | likely ortholog of mouse Gli-similar 1 Kruppel-like zinc finger (Glis1) | FLJ36155 | 0.82 |
| IMAGE:842846 | Hs.6441 | tissue inhibitor of metalloproteinase 2 | TIMP2 | 0.82 |
| IMAGE:48725 | Hs.15827 | sorting nexin 11 | SNX11 | 0.82 |
| IMAGE:795308 | Hs.99357 | CDNA: FLJ21519 fis, clone COL05863 |  | 0.82 |
| IMAGE:624754 | Hs.179881 | core-binding factor, beta subunit | CBFB | 0.82 |

Cluster 5 : PGC-1 and rosiglitazone and retinoic acid up regulated genes.

| Clones | Unigene number | Name | Symbol | Ratio |
| --- | --- | --- | --- | --- |
| IMAGE:813648 | Hs.74635 | dihydrolipoamide dehydrogenase (E3 component of pyruvate dehydrogenase complex, 2-oxo-glutarate complex, branched chain keto acid dehydrogenase complex) | DLD | 2.47 |
| IMAGE:814765 | Hs.78921 | A kinase (PRKA) anchor protein 1 | AKAP1 | 2.44 |
| IMAGE:39821 | Hs.421474 | ATP-binding cassette, sub-family A (ABC1), member 5 | ABCA5 | 2.43 |
| IMAGE:173087 | Hs.25223 | ubiquitin carboxyl-terminal hydrolase L5 | UCHL5 | 2.40 |
| IMAGE:49595 | Hs.443081 | DKFZP434F091 protein | DKFZP434F091 | 2.39 |
| IMAGE:469345 | Hs.12337 | kinase insert domain receptor (a type III receptor tyrosine kinase) | KDR | 2.32 |
| IMAGE:840606 | Hs.356894 | hydroxysteroid (17-beta) dehydrogenase 4 | HSD17B4 | 2.24 |
| IMAGE:825224 | Hs.371698 | RAE1 RNA export 1 homolog (S. pombe) | RAE1 | 2.22 |
| IMAGE:1456721 | Hs.331202 | mitochondrial ribosomal protein L42 | MRPL42 | 2.18 |
| IMAGE:1536236 | Hs.408702 | hypothetical protein FLJ13154 | FLJ13154 | 2.17 |
| IMAGE:432042 | Hs.446648 | adaptor-related protein complex 3, beta 1 subunit | AP3B1 | 2.16 |
| IMAGE:359723 | Hs.274543 | mitochondrial elongation factor G1 | EFG1 | 2.16 |
| IMAGE:290552 | Hs.167031 | GTPase activating RANGAP domain-like 1 | GARNL1 | 2.16 |
| IMAGE:340558 | Hs.126222 | actin related protein 2/3 complex, subunit 5, 16kDa | ARPC5 | 2.15 |
| IMAGE:256975 | Hs.433466 | Protein kinase D3 | PRKD3 | 2.14 |
| IMAGE:824126 | Hs.435982 | Transmembrane protein 48 | TMEM48 | 2.13 |
| IMAGE:841703 | Hs.185726 | transferrin receptor (p90, CD71) | TFRC | 2.12 |
| IMAGE:2504022 | Hs.152707 | glioblastoma amplified sequence | GBAS | 2.06 |
| IMAGE:50777 | Hs.436849 | Rho guanine nucleotide exchange factor (GEF) 10-like | ARHGEF10L | 2.05 |
| IMAGE:504979 | Hs.303676 | Ras-GTPase activating protein SH3 domain-binding protein 2 | G3BP2 | 2.03 |
| IMAGE:77539 | Hs.10458 | chemokine (C-C motif) ligand 16 | CCL16 | 2.02 |
| IMAGE:433490 | Hs.318381 | casein kinase 1, alpha 1 | CSNK1A1 | 2.02 |
| IMAGE:124127 | Hs.83918 | adenosine monophosphate deaminase (isoform E) | AMPD3 | 2.00 |
| IMAGE:897301 | Hs.311346 | cytidine monophosphate N-acetylneuraminic acid synthetase | CMAS | 1.99 |
| IMAGE:665385 | Hs.8207 | GK001 protein | GK001 | 1.99 |
| IMAGE:417327 | Hs.94631 | brefeldin A-inhibited guanine nucleotide-exchange protein 1 | BIG1 | 1.99 |
| IMAGE:32587 | Hs.370431 | N-ethylmaleimide-sensitive factor attachment protein, gamma | NAPG | 1.94 |
| IMAGE:770675 | Hs.75914 | coated vesicle membrane protein | RNP24 | 1.91 |
| IMAGE:970613 | Hs.81848 | RAD21 homolog (S. pombe) | RAD21 | 1.90 |
| IMAGE:156363 | Hs.412186 | ARP8 actin-related protein 8 homolog (yeast) | ACTR8 | 1.90 |
| IMAGE:2517344 | Hs.183434 | ATPase, H+ transporting, lysosomal accessory protein 2 | ATP6AP2 | 1.90 |
| IMAGE:338736 | Hs.381167 | serine (or cysteine) proteinase inhibitor, clade B (ovalbumin), member 1 | SERPINB1 | 1.89 |
| IMAGE:823794 | Hs.2236 | NIMA (never in mitosis gene a)-related kinase 3 | NEK3 | 1.87 |
| IMAGE:898092 | Hs.410037 | connective tissue growth factor | CTGF | 1.86 |
| IMAGE:712139 | Hs.111554 | ADP-ribosylation factor-like 7 | ARL7 | 1.86 |
| IMAGE:360743 | Hs.25726 | transposon-derived Buster1 transposase-like protein | LOC58486 | 1.85 |
| IMAGE:286503 | Hs.368598 | likely ortholog of mouse immediate early response, erythropoietin 4 | LEREPO4 | 1.84 |
| IMAGE:277508 | Hs.300063 | ankyrin repeat and SOCS box-containing 13 | ASB13 | 1.83 |
| IMAGE:810272 | Hs.269777 | protein phosphatase 1, regulatory (inhibitor) subunit 12B | PPP1R12B | 1.83 |
| IMAGE:450305 | Hs.18740 | hypothetical protein FLJ22609 | FLJ22609 | 1.82 |
| IMAGE:32299 | Hs.5753 | inositol(myo)-1(or 4)-monophosphatase 2 | IMPA2 | 1.82 |
| IMAGE:1699127 | Hs.130310 | cyclin B3 | CCNB3 | 1.82 |
| IMAGE:824156 | Hs.250899 | heat shock factor binding protein 1 | HSBP1 | 1.81 |
| IMAGE:810844 | Hs.181406 | hypothetical protein FLJ22301 | FLJ22301 | 1.79 |
| IMAGE:545403 | Hs.114412 | thioredoxin-like, 32kDa | TXNL | 1.79 |
| IMAGE:243524 | Hs.135941 | MRNA; cDNA DKFZp686K16132 (from clone DKFZp686K16132) |  | 1.78 |
| IMAGE:2239277 | Hs.150981 | transient receptor potential cation channel, subfamily C, member 3 | TRPC3 | 1.78 |
| IMAGE:824376 | Hs.285280 | chromosome 14 open reading frame 35 | C14orf35 | 1.77 |
| IMAGE:768989 | Hs.56847 | CDNA FLJ12874 fis, clone NT2RP2003769 |  | 1.77 |
| IMAGE:39922 | Hs.7022 | dedicator of cytokinesis 3 | DOCK3 | 1.77 |
| IMAGE:322192 | Hs.95549 | RNA-binding protein | FLJ20273 | 1.77 |
| IMAGE:203544 | Hs.130946 | egl nine homolog 1 (C. elegans) | EGLN1 | 1.76 |
| IMAGE:898253 | Hs.79088 | reticulocalbin 2, EF-hand calcium binding domain | RCN2 | 1.76 |
| IMAGE:713653 | Hs.78871 | mesoderm development candidate 2 | MESDC2 | 1.75 |
| IMAGE:199258 | Hs.496526 | CDNA FLJ34000 fis, clone FCBBF1000069 |  | 1.75 |
| 1291954 | Hs.455325 | Transcribed sequence with moderate similarity to protein ref:NP_055568.1 (H.sapiens) KIAA0187 gene product [Homo sapiens] |  | 1.75 |
| IMAGE:859812 | Hs.427212 | asparaginyl-tRNA synthetase | NARS | 1.74 |
| IMAGE:795825 | Hs.286194 | solute carrier family 24 (sodium/potassium/calcium exchanger), member 6 | NCKX6 | 1.72 |
| IMAGE:809557 | Hs.179565 | MCM3 minichromosome maintenance deficient 3 (S. cerevisiae) | MCM3 | 1.72 |
| IMAGE:768579 | Hs.107040 | Acyl-CoA thioesterase 8 | ACOT8 | 1.71 |
| IMAGE:1627705 | Hs.16229 | associated molecule with the SH3 domain of STAM (AMSH) like protein | AMSH-LP | 1.70 |
| IMAGE:845432 | Hs.238679 | Ras-related GTP binding D | RRAGD | 1.70 |
| IMAGE:784016 | Hs.310231 | PAK1 interacting protein 1 | PAK1IP1 | 1.69 |
| IMAGE:858293 | Hs.74405 | tyrosine 3-monooxygenase/tryptophan 5-monooxygenase activation protein, theta polypeptide | YWHAQ | 1.68 |
| IMAGE:884436 | Hs.512812 | embryonic ectoderm development | EED | 1.66 |
| IMAGE:786169 | Hs.406485 | GGA binding partner | FLJ11088 | 1.66 |
| IMAGE:28654 | Hs.42959 | KIAA1012 | KIAA1012 | 1.66 |
| IMAGE:470144 | Hs.7200 | NIMA (never in mitosis gene a)- related kinase 9 | NEK9 | 1.66 |
| IMAGE:842980 | Hs.115242 | developmentally regulated GTP binding protein 1 | DRG1 | 1.65 |
| IMAGE:2018680 | Hs.246603 | huntingtin interacting protein 2 | HIP2 | 1.64 |
| IMAGE:249755 | Hs.284270 | Kelch domain containing 5 | KLHDC5 | 1.64 |
| IMAGE:308060 | Hs.436803 | von Hippel-Lindau binding protein 1 | VBP1 | 1.64 |
| IMAGE:42076 | Hs.446568 | TRK-fused gene | TFG | 1.63 |
| IMAGE:306484 | Hs.22630 | cofactor required for Sp1 transcriptional activation, subunit 6, 77kDa | CRSP6 | 1.63 |
| IMAGE:204360 | Hs.245537 | hypothetical protein MGC54289 | MGC54289 | 1.63 |
| IMAGE:563634 | Hs.44893 | dendritic cell protein | GA17 | 1.62 |
| IMAGE:142259 | Hs.390162 | optineurin | OPTN | 1.62 |
| IMAGE:268178 | Hs.155560 | calnexin | CANX | 1.62 |
| IMAGE:50693 | Hs.505742 | hypothetical protein FLJ20232 | FLJ20232 | 1.62 |
| IMAGE:291345 | Hs.519667 | casein kinase 1, alpha 1 | CSNK1A1 | 1.62 |
| IMAGE:246300 | Hs.335786 | TIA1 cytotoxic granule-associated RNA binding protein-like 1 | TIAL1 | 1.62 |
| IMAGE:176565 | Hs.28827 | mitogen-activated protein kinase kinase kinase 2 | MAP3K2 | 1.62 |
| IMAGE:754033 | Hs.30824 | leucine zipper transcription factor-like 1 | LZTFL1 | 1.62 |
| IMAGE:50754 | Hs.149894 | mitochondrial translational initiation factor 2 | MTIF2 | 1.62 |
| IMAGE:1520889 | Hs.442605 | Transcribed sequence with strong similarity to protein ref:NP_068598.1 (H.sapiens) hypothetical protein FLJ13149 [Homo sapiens] |  | 1.61 |
| IMAGE:2018634 | Hs.243209 | neuronal PAS domain protein 3 | NPAS3 | 1.61 |
| IMAGE:366663 | Hs.48353 | CDNA FLJ32274 fis, clone PROST2000036 |  | 1.61 |
| IMAGE:240748 | Hs.29106 | dual specificity phosphatase 22 | DUSP22 | 1.61 |
| IMAGE:627118 | Hs.101364 | HCV NS3-transactivated protein 1 | NS3TP1 | 1.61 |
| IMAGE:144862 | Hs.278391 | TRIF-related adaptor molecule | TIRP | 1.61 |
| IMAGE:1573944 | Hs.130456 | KIAA0103 | KIAA0103 | 1.60 |
| IMAGE:233299 | Hs.444729 | hypothetical protein FLJ32096 | FLJ32096 | 1.60 |
| IMAGE:841217 | Hs.333738 | Bardet-Biedl syndrome 2 | BBS2 | 1.60 |
| IMAGE:843133 | Hs.376200 | mitochondrial ribosomal protein S27 | MRPS27 | 1.59 |
| IMAGE:566054 | Hs.166684 | serine/threonine kinase 3 (STE20 homolog, yeast) | STK3 | 1.59 |
| IMAGE:646657 | Hs.14511 | SCO cytochrome oxidase deficient homolog 1 (yeast) | SCO1 | 1.59 |
| IMAGE:1897950 | Hs.122140 | hypothetical protein FLJ22557 | FLJ22557 | 1.59 |
| IMAGE:110330 | Hs.125457 | recombination protein REC14 | REC14 | 1.59 |
| IMAGE:813698 | Hs.18676 | sprouty homolog 2 (Drosophila) | SPRY2 | 1.59 |
| IMAGE:132569 | Hs.170291 | ovarian carcinoma immunoreactive antigen | OCIA | 1.58 |
| IMAGE:210862 | Hs.379991 | acyl-Coenzyme A oxidase 1, palmitoyl | ACOX1 | 1.58 |
| IMAGE:869182 | Hs.26703 | CCR4-NOT transcription complex, subunit 8 | CNOT8 | 1.58 |
| IMAGE:781061 | Hs.22116 | CDC14 cell division cycle 14 homolog B (S. cerevisiae) | CDC14B | 1.58 |
| IMAGE:503155 | Hs.531157 | Clone IMAGE:5535317, mRNA |  | 1.58 |
| IMAGE:768237 | Hs.439683 | karyopherin (importin) beta 1 | KPNB1 | 1.57 |
| IMAGE:1947827 | Hs.524731 | Transcribed sequence |  | 1.57 |
| IMAGE:969650 | Hs.7934 | secretory carrier membrane protein 5 | SCAMP5 | 1.57 |
| IMAGE:1420801 | Hs.388125 | regulator of nonsense transcripts 1 | RENT1 | 1.57 |
| IMAGE:2011308 | Hs.273344 | DKFZP564O0463 protein | DKFZP564O0463 | 1.57 |
| IMAGE:810305 | Hs.421622 | WIRE protein | WIRE | 1.57 |
| IMAGE:841287 | Hs.12482 | glyceronephosphate O-acyltransferase | GNPAT | 1.57 |
| IMAGE:115292 | Hs.108338 | hypothetical protein DKFZp586C1924 | DKFZp586C1924 | 1.57 |
| IMAGE:1493107 | Hs.294584 | leukotriene B4 12-hydroxydehydrogenase | LTB4DH | 1.57 |
| IMAGE:340840 | Hs.334534 | glucosamine (N-acetyl)-6-sulfatase (Sanfilippo disease IIID) | GNS | 1.56 |
| IMAGE:203469 | Hs.131059 | ankyrin repeat domain 17 | ANKRD17 | 1.56 |
| IMAGE:435025 | Hs.477083 | platelet-activating factor acetylhydrolase 2, 40kDa | PAFAH2 | 1.56 |
| IMAGE:174654 | Hs.20107 | kinesin 2 60/70kDa | KNS2 | 1.56 |
| IMAGE:1472698 | Hs.349092 | LOC388789 (LOC388789), mRNA |  | 1.56 |
| IMAGE:448016 | Hs.140443 | similar to RIKEN cDNA 2700047N05 | LOC134492 | 1.56 |
| IMAGE:298128 | Hs.12802 | development and differentiation enhancing factor 2 | DDEF2 | 1.56 |
| IMAGE:486171 | Hs.192190 | centaurin, delta 2 | CENTD2 | 1.56 |
| IMAGE:128802 | Hs.420147 | CDNA FLJ12097 fis, clone HEMBB1002617 |  | 1.55 |
| IMAGE:52635 | Hs.235195 | mediator subunit 25 | MED25 | 1.55 |
| IMAGE:743987 | Hs.370800 | ADP-ribosylation factor-like 6 interacting protein 2 | ARL6IP2 | 1.55 |
| IMAGE:795735 | Hs.247478 | HLA-B associated transcript 4 | BAT4 | 1.55 |
| IMAGE:2018808 | Hs.314089 | prolylcarboxypeptidase (angiotensinase C) | PRCP | 1.55 |
| IMAGE:1475987 | Hs.254717 | KIAA0116 protein | KIAA0116 | 1.54 |
| IMAGE:362628 | Hs.435671 | KIAA0982 protein | KIAA0982 | 1.54 |
| IMAGE:222343 | Hs.24715 | SH3 domain protein D19 | DKFZp434D0215 | 1.54 |
| IMAGE:33076 | Hs.225567 | choline phosphotransferase 1 | CHPT1 | 1.53 |
| IMAGE:268234 | Hs.181042 | Dmx-like 1 | DMXL1 | 1.53 |
| IMAGE:2577249 | Hs.420233 | Human HepG2 partial cDNA, clone hmd1c10m5. |  | 1.53 |
| IMAGE:626364 | Hs.236828 | Werner helicase interacting protein 1 | WRNIP1 | 1.53 |
| IMAGE:245277 | Hs.17109 | integral membrane protein 2A | ITM2A | 1.53 |
| IMAGE:770337 | Hs.436133 | ubiquitin specific protease 32 | USP32 | 1.53 |
| IMAGE:133114 | Hs.19545 | frizzled homolog 4 (Drosophila) | FZD4 | 1.53 |
| IMAGE:294913 | Hs.171558 | sex comb on midleg-like 2 (Drosophila) | SCML2 | 1.53 |
| IMAGE:51532 | Hs.75249 | ADP-ribosylation factor-like 6 interacting protein | ARL6IP | 1.53 |
| IMAGE:194351 | Hs.350518 | tripartite motif-containing 6 | TRIM6 | 1.53 |
| IMAGE:52076 | Hs.74376 | olfactomedin 1 | OLFM1 | 1.52 |
| IMAGE:50606 | Hs.446850 | chromosome 14 open reading frame 100 | C14orf100 | 1.52 |
| IMAGE:128509 | Hs.145509 | hypothetical protein KIAA1434 | KIAA1434 | 1.52 |
| IMAGE:39833 | Hs.95594 | carboxypeptidase, vitellogenic-like | CPVL | 1.52 |
| IMAGE:815737 | Hs.416456 | FN5 protein | FN5 | 1.51 |
| IMAGE:252637 | Hs.210367 | splicing factor, arginine/serine-rich 2, interacting protein | SFRS2IP | 1.51 |
| IMAGE:343737 | Hs.359289 | transcription factor 4 | TCF4 | 1.51 |
| IMAGE:460106 | Hs.277962 | sphingomyelin phosphodiesterase, acid-like 3A | SMPDL3A | 1.51 |
| IMAGE:377246 | Hs.406234 | calcium binding protein P22 | CHP | 1.50 |
| IMAGE:826089 | Hs.13572 | calcium modulating ligand | CAMLG | 1.50 |
| IMAGE:712347 | Hs.287727 | valosin-containing protein (p97)/p47 complex-interacting protein p135 | VCIP135 | 1.50 |
| IMAGE:271006 | Hs.115285 | dihydrolipoamide S-acetyltransferase (E2 component of pyruvate dehydrogenase complex) | DLAT | 1.50 |
| IMAGE:139113 | Hs.18271 | golgi phosphoprotein 3 (coat-protein) | GOLPH3 | 1.50 |
| IMAGE:897806 | Hs.412416 | hypoxia-inducible factor 1, alpha subunit (basic helix-loop-helix transcription factor) | HIF1A | 1.50 |
| IMAGE:126225 | Hs.170918 | chromosome 20 open reading frame 155 | C20orf155 | 1.50 |
| IMAGE:327353 | Hs.173092 | solute carrier family 24 (sodium/potassium/calcium exchanger), member 1 | SLC24A1 | 1.50 |
| IMAGE:267859 | Hs.8645 | TBC1 domain family, member 7 | TBC1D7 | 1.49 |
| IMAGE:281745 | Hs.356537 | dishevelled associated activator of morphogenesis 1 | DAAM1 | 1.49 |
| IMAGE:47291 | Hs.360026 | baculoviral IAP repeat-containing 6 (apollon) | BIRC6 | 1.49 |
| IMAGE:290749 | Hs.266331 | Fc receptor homolog expressed in B cells | FREB | 1.49 |
| IMAGE:72054 | Hs.416089 | ADP-ribosylation factor interacting protein 1 (arfaptin 1) | ARFIP1 | 1.49 |
| IMAGE:1685029 | Hs.221040 | HBS1-like (S. cerevisiae) | HBS1L | 1.49 |
| IMAGE:782501 | Hs.6748 | hypothetical protein PP1665 | PP1665 | 1.49 |
| IMAGE:814522 | Hs.440310 | hypothetical protein MGC41816 | MGC41816 | 1.49 |
| IMAGE:824130 | Hs.147097 | H2A histone family, member X | H2AFX | 1.49 |
| IMAGE:2010949 | Hs.75342 | malic enzyme 2, NAD(+)-dependent, mitochondrial | ME2 | 1.49 |
| IMAGE:609929 | Hs.284288 | DEAD (Asp-Glu-Ala-Asp) box polypeptide 47 | DDX47 | 1.49 |
| IMAGE:270917 | Hs.7306 | secreted frizzled-related protein 1 | SFRP1 | 1.48 |
| IMAGE:322617 | Hs.348024 | v-ral simian leukemia viral oncogene homolog B (ras related; GTP binding protein) | RALB | 1.48 |
| IMAGE:145388 | Hs.432552 | golgi SNAP receptor complex member 2 | GOSR2 | 1.48 |
| IMAGE:823692 | Hs.356427 | PAI-1 mRNA-binding protein | PAI-RBP1 | 1.48 |
| IMAGE:198559 | Hs.136102 | KIAA0853 | KIAA0853 | 1.48 |
| IMAGE:810036 | Hs.446678 | nuclear receptor coactivator 2 | NCOA2 | 1.48 |
| IMAGE:1913855 | Hs.44298 | mitochondrial ribosomal protein S17 | MRPS17 | 1.48 |
| IMAGE:358713 | Hs.237825 | signal recognition particle 72kDa | SRP72 | 1.48 |
| IMAGE:2014034 | Hs.154672 | methylene tetrahydrofolate dehydrogenase (NAD+ dependent), methenyltetrahydrofolate cyclohydrolase | MTHFD2 | 1.48 |
| IMAGE:786291 | Hs.372528 | chloride channel 3 | CLCN3 | 1.48 |
| IMAGE:1554646 | Hs.259785 | carnitine palmitoyltransferase 1A (liver) | CPT1A | 1.48 |
| IMAGE:50920 | Hs.23853 | hypothetical protein FLJ35036 | FLJ35036 | 1.48 |
| IMAGE:198690 | Hs.95220 | oxidative-stress responsive 1 | OSR1 | 1.48 |
| IMAGE:1947865 | Hs.86405 | splicing factor YT521-B | YT521 | 1.47 |
| IMAGE:745011 | Hs.173094 | KIAA1750 protein | KIAA1750 | 1.47 |
| IMAGE:233308 | Hs.7922 | HSPC154 protein | HSPC154 | 1.47 |
| IMAGE:280004 | Hs.28578 | muscleblind-like (Drosophila) | MBNL1 | 1.47 |
| IMAGE:261567 | Hs.25812 | Nijmegen breakage syndrome 1 (nibrin) | NBS1 | 1.47 |
| IMAGE:135673 | Hs.151449 | suppression of tumorigenicity 18 (breast carcinoma) (zinc finger protein) | ST18 | 1.47 |
| IMAGE:897733 | Hs.298275 | solute carrier family 38, member 2 | SLC38A2 | 1.47 |
| IMAGE:745364 | Hs.98834 | MRNA; cDNA DKFZp686J1229 (from clone DKFZp686J1229) |  | 1.47 |
| IMAGE:2011515 | Hs.279580 | KIAA1279 | KIAA1279 | 1.47 |
| IMAGE:2018820 | Hs.143641 | low density lipoprotein receptor-related protein 3 | LRP3 | 1.46 |
| IMAGE:1635221 | Hs.120439 | ethanolamine kinase | EKI1 | 1.46 |
| IMAGE:292881 | Hs.435675 | cleavage and polyadenylation specific factor 2, 100kDa | CPSF2 | 1.46 |
| IMAGE:840818 | Hs.81008 | filamin B, beta (actin binding protein 278) | FLNB | 1.46 |
| IMAGE:136180 | Hs.43322 | protein kinase, AMP-activated, alpha 1 catalytic subunit | PRKAA1 | 1.46 |
| IMAGE:1472479 | Hs.5324 | hypothetical protein CL25022 | CL25022 | 1.46 |
| IMAGE:2505458 | Hs.180612 | peroxisomal membrane protein 3, 35kDa (Zellweger syndrome) | PXMP3 | 1.46 |
| IMAGE:868494 | Hs.502577 | phosphodiesterase 4D interacting protein (myomegalin) | PDE4DIP | 1.46 |
| IMAGE:42880 | Hs.397734 | cyclin-dependent kinase 8 | CDK8 | 1.46 |
| IMAGE:2554697 | Hs.126057 | frequently rearranged in advanced T-cell lymphomas | FRAT1 | 1.46 |
| IMAGE:627086 | Hs.12457 | nucleoporin 133kDa | NUP133 | 1.46 |
| IMAGE:882439 | Hs.231411 | transforming growth factor beta regulator 4 | TBRG4 | 1.46 |
| IMAGE:502286 | Hs.348929 | KIAA1219 protein | KIAA1219 | 1.46 |
| IMAGE:2050827 | Hs.79387 | proteasome (prosome, macropain) 26S subunit, ATPase, 5 | PSMC5 | 1.45 |
| IMAGE:771157 | Hs.61960 | potassium channel tetramerisation domain containing 5 | KCTD5 | 1.45 |
| IMAGE:877884 | Hs.298573 | KIAA1720 protein | KIAA1720 | 1.45 |
| IMAGE:878759 | Hs.246590 | poly(A) binding protein, cytoplasmic 5 | PABPC5 | 1.45 |
| IMAGE:502530 | Hs.16677 | WD repeat domain 11 | WDR11 | 1.45 |
| IMAGE:191904 | Hs.418533 | BUB3 budding uninhibited by benzimidazoles 3 homolog (yeast) | BUB3 | 1.45 |
| IMAGE:703844 | Hs.50216 | zinc finger protein (ZFD25) | ZFD25 | 1.45 |
| IMAGE:134363 | Hs.113319 | kinesin heavy chain member 2 | KIF2 | 1.44 |
| IMAGE:36607 | Hs.8372 | ubiquinol-cytochrome c reductase (6.4kD) subunit | UQCR | 1.44 |
| IMAGE:1505919 | Hs.125657 | Transcribed sequences |  | 1.44 |
| IMAGE:261714 | Hs.259230 | amyotrophic lateral sclerosis 2 (juvenile) chromosome region, candidate 2 | ALS2CR2 | 1.44 |
| IMAGE:1517288 | Hs.438872 | chromosome 6 open reading frame 72 | C6orf72 | 1.44 |
| IMAGE:491180 | Hs.319677 | aconitase 1, soluble | ACO1 | 1.44 |
| IMAGE:950489 | Hs.443914 | superoxide dismutase 1, soluble (amyotrophic lateral sclerosis 1 (adult)) | SOD1 | 1.44 |
| IMAGE:713178 | Hs.480368 | eukaryotic translation initiation factor 2, subunit 3 gamma, 52kDa | EIF2S3 | 1.44 |
| IMAGE:84068 | Hs.438336 | XTP3-transactivated protein B | XTP3TPB | 1.44 |
| IMAGE:853006 | Hs.324470 | adducin 3 (gamma) | ADD3 | 1.44 |
| IMAGE:782684 | Hs.58382 | chromosome 6 open reading frame 64 | C6orf64 | 1.44 |
| IMAGE:32770 | Hs.254642 | hypothetical protein FLJ11506 | FLJ11506 | 1.44 |
| IMAGE:897215 | Hs.454533 | KIAA0930 protein | KIAA0930 | 1.44 |
| IMAGE:230376 | Hs.69771 | B-factor, properdin | BF | 1.44 |
| IMAGE:788444 | Hs.531471 | Transcribed sequence with weak similarity to protein ref:NP_542383.1 (H.sapiens) hypothetical protein MGC15397 [Homo sapiens] |  | 1.44 |

Cluster 6 : PGC-1 and rosiglitazone and retinoic acid down regulated genes.

| Clones | Unigene number | Name | Symbol | Ratio |
| --- | --- | --- | --- | --- |
| IMAGE:263836 | Hs.173911 | zinc finger protein 24 (KOX 17) | ZNF24 | 0.42 |
| IMAGE:810612 | Hs.417004 | S100 calcium binding protein A11 (calgizzarin) | S100A11 | 0.42 |
| IMAGE:490961 | Hs.458485 | interferon, alpha-inducible protein (clone IFI-15K) | G1P2 | 0.45 |
| IMAGE:377282 | Hs.119597 | stearoyl-CoA desaturase (delta-9-desaturase) | SCD | 0.45 |
| IMAGE:1695674 | Hs.351558 | hypothetical protein FLJ32389 | FLJ32389 | 0.46 |
| IMAGE:769933 | Hs.339697 | glutamate receptor, ionotropic, N-methyl D-asparate-associated protein 1 (glutamate binding) | GRINA | 0.48 |
| IMAGE:782503 | Hs.503546 | fatty acid desaturase 1 | FADS1 | 0.48 |
| IMAGE:741991 | Hs.436836 | myxovirus (influenza virus) resistance 1, interferon-inducible protein p78 (mouse) | MX1 | 0.48 |
| IMAGE:898125 | Hs.431332 | Clone IMAGE:5311297, mRNA |  | 0.49 |
| IMAGE:342712 | Hs.269902 | KIAA0494 gene product | KIAA0494 | 0.51 |
| IMAGE:377461 | Hs.74034 | caveolin 1, caveolae protein, 22kDa | CAV1 | 0.52 |
| IMAGE:510383 | Hs.458414 | interferon induced transmembrane protein 1 (9-27) | IFITM1 | 0.52 |
| IMAGE:757138 | Hs.463648 | Similar to DEAH (Asp-Glu-Ala-His) box polypeptide 40 (LOC390805), mRNA |  | 0.52 |
| IMAGE:45607 | Hs.365689 | immunoglobulin superfamily, member 4B | IGSF4B | 0.53 |
| IMAGE:566383 | Hs.125087 | Transcribed sequences |  | 0.53 |
| IMAGE:341774 | Hs.69707 | CDNA FLJ32165 fis, clone PLACE6000424 |  | 0.53 |
| IMAGE:259870 | Hs.44098 | Transcribed sequences |  | 0.54 |
| IMAGE:279690 | Hs.93956 | Transcribed sequences |  | 0.54 |
| IMAGE:120600 | Hs.17518 | viperin | cig5 | 0.54 |
| IMAGE:324861 | Hs.77432 | epidermal growth factor receptor (erythroblastic leukemia viral (v-erb-b) oncogene homolog, avian) | EGFR | 0.55 |
| IMAGE:243405 | Hs.78547 | zinc finger protein (clone 647) | MGC9718 | 0.55 |
| IMAGE:238886 | Hs.109051 | SH3 domain binding glutamic acid-rich protein like 3 | SH3BGRL3 | 0.55 |
| IMAGE:450043 | Hs.515438 | Transcribed sequence with moderate similarity to protein pir:A33258 (H.sapiens) A33258 pregnancy-specific glycoprotein 1 precursor variant a - human |  | 0.56 |
| IMAGE:285544 | Hs.512715 | Werner syndrome | WRN | 0.56 |
| IMAGE:503581 | Hs.416854 | RAS-like, estrogen-regulated, growth-inhibitor | RERG | 0.56 |
| IMAGE:1010178 | Hs.101307 | solute carrier family 14 (urea transporter), member 1 (Kidd blood group) | SLC14A1 | 0.56 |
| IMAGE:1878056 | Hs.145919 | Guanylate binding protein 1, interferon-inducible, 67kDa | GBP1 | 0.57 |
| IMAGE:1862145 | Hs.408458 | WW domain containing E3 ubiquitin protein ligase 2 | WWP2 | 0.57 |
| IMAGE:293637 | Hs.132652 | Transcribed sequences |  | 0.57 |
| IMAGE:302540 | Hs.432605 | UDP-glucose ceramide glucosyltransferase | UGCG | 0.57 |
| IMAGE:1324109 | Hs.122939 | hypothetical protein FLJ20581 | FLJ20581 | 0.57 |
| IMAGE:429390 | Hs.13138 | SUMO1/sentrin specific protease 5 | SENP5 | 0.57 |
| IMAGE:1468587 | Hs.326357 | Transcribed sequences |  | 0.57 |
| IMAGE:183103 | Hs.512856 | KIAA0420 gene product | KIAA0420 | 0.58 |
| IMAGE:250869 | Hs.357901 | SRY (sex determining region Y)-box 4 | SOX4 | 0.58 |
| IMAGE:436364 | Hs.25882 | gem (nuclear organelle) associated protein 5 | GEMIN5 | 0.58 |
| IMAGE:283871 | Hs.436968 | ATP/GTP binding protein 1 | AGTPBP1 | 0.58 |
| IMAGE:726578 | Hs.445876 | Hypothetical gene supported by BC021188 (LOC389122), mRNA |  | 0.59 |
| IMAGE:198453 | Hs.381008 | major histocompatibility complex, class I, E | HLA-E | 0.59 |
| IMAGE:838262 | Hs.439144 | thyroid hormone receptor associated protein 1 | THRAP1 | 0.59 |
| IMAGE:1745396 | Hs.10026 | mitochondrial ribosomal protein L17 | MRPL17 | 0.59 |
| IMAGE:1415750 | Hs.181307 | H3 histone, family 3A | H3F3A | 0.59 |
| IMAGE:744360 | Hs.268016 | mitochondrial ribosomal protein S6 | MRPS6 | 0.60 |
| IMAGE:431873 | Hs.117120 | Transcribed sequences |  | 0.60 |
| IMAGE:1536991 | Hs.7956 | Transcribed sequence with weak similarity to protein ref:NP_055301.1 (H.sapiens) neuronal thread protein [Homo sapiens] |  | 0.60 |
| IMAGE:1700381 | Hs.133438 | Transcribed sequences |  | 0.60 |
| IMAGE:756595 | Hs.143873 | S100 calcium binding protein A10 (annexin II ligand, calpactin I, light polypeptide (p11)) | S100A10 | 0.60 |
| IMAGE:47005 | Hs.459881 | CDNA FLJ42708 fis, clone BRAMY3007311 |  | 0.60 |
| IMAGE:730145 | Hs.177927 | hypothetical protein FLJ33768 | FLJ33768 | 0.60 |
| IMAGE:320797 | Hs.357637 | exostoses (multiple)-like 2 | EXTL2 | 0.60 |
| IMAGE:290702 | Hs.50078 | Coiled-coil domain containing 34 | CCDC34 | 0.60 |
| IMAGE:770355 | Hs.442223 | lanosterol synthase (2,3-oxidosqualene-lanosterol cyclase) | LSS | 0.60 |
| IMAGE:1619453 | Hs.130253 | Transcribed sequences |  | 0.61 |
| IMAGE:452345 | Hs.115617 | corticotropin releasing hormone binding protein | CRHBP | 0.61 |
| IMAGE:1519151 | Hs.409194 | tankyrase, TRF1-interacting ankyrin-related ADP-ribose polymerase | TNKS | 0.61 |
| IMAGE:898236 | Hs.136503 | Transcribed sequences |  | 0.61 |
| IMAGE:782840 | Hs.99126 | Transcribed sequence with weak similarity to protein ref:NP_060137.1 (H.sapiens) hypothetical protein FLJ20097 [Homo sapiens] |  | 0.61 |
| IMAGE:511303 | Hs.410477 | phospholipase A2 receptor 1, 180kDa | PLA2R1 | 0.61 |
| IMAGE:200402 | Hs.70704 | chromosome 20 open reading frame 129 | C20orf129 | 0.61 |
| IMAGE:1500000 | Hs.180779 | histone 1, H2bd | HIST1H2BD | 0.61 |
| IMAGE:731229 | Hs.119225 | Transcribed sequences |  | 0.61 |
| IMAGE:1557313 | Hs.444174 | CDNA FLJ42069 fis, clone SYNOV2011233 |  | 0.61 |
| IMAGE:291271 | Hs.58593 | general transcription factor IIF, polypeptide 2, 30kDa | GTF2F2 | 0.62 |
| IMAGE:2565135 | Hs.172914 | retinol dehydrogenase 5 (11-cis and 9-cis) | RDH5 | 0.62 |
| IMAGE:342994 | Hs.16953 | ubiquitin-specific proteinase 31 | USP31 | 0.62 |
| IMAGE:131877 | Hs.163813 | Transcribed sequences |  | 0.62 |
| IMAGE:754601 | Hs.153322 | phospholipase C-like 1 | PLCL1 | 0.62 |
| IMAGE:704410 | Hs.278408 | three prime repair exonuclease 1 | TREX1 | 0.62 |
| IMAGE:32537 | Hs.236828 | Werner helicase interacting protein 1 | WRNIP1 | 0.62 |
| IMAGE:1742060 | Hs.143811 | APin protein | APIN | 0.62 |
| IMAGE:307302 | Hs.216756 | Transcribed sequences |  | 0.62 |
| IMAGE:28243 | Hs.100839 | Transcribed sequences |  | 0.62 |
| IMAGE:261851 | Hs.11101 | discs, large homolog 3 (neuroendocrine-dlg, Drosophila) | DLG3 | 0.62 |
| IMAGE:2048836 | Hs.1987 | CD28 antigen (Tp44) | CD28 | 0.63 |
| IMAGE:1471817 | Hs.299678 | Transcribed sequence with weak similarity to protein ref:NP_060312.1 (H.sapiens) hypothetical protein FLJ20489 [Homo sapiens] |  | 0.63 |
| IMAGE:433294 | Hs.440808 | formin binding protein 1 | FNBP1 | 0.63 |
| IMAGE:277066 | Hs.213194 | SRY (sex determining region Y)-box 7 | SOX7 | 0.63 |
| IMAGE:1915280 | Hs.209153 | angiopoietin-like 3 | ANGPTL3 | 0.63 |
| IMAGE:505289 | Hs.12854 | angiotensin II receptor-associated protein | AGTRAP | 0.63 |
| IMAGE:377468 | Hs.436944 | sprouty homolog 1, antagonist of FGF signaling (Drosophila) | SPRY1 | 0.63 |
| IMAGE:1892300 | Hs.446506 | ribosomal protein L7-like 1 | RPL7L1 | 0.63 |
| IMAGE:1504370 | Hs.130024 | Zinc finger and BTB domain containing 25 | ZBTB25 | 0.63 |
| IMAGE:341201 | Hs.424212 | forkhead box D3 | FOXD3 | 0.63 |
| IMAGE:896927 | Hs.128927 | CDNA FLJ13276 fis, clone OVARC1001040 |  | 0.63 |
| IMAGE:700461 | Hs.122934 | hypothetical protein FLJ23861 | FLJ23861 | 0.64 |
| IMAGE:1689948 | Hs.11779 | dehydrogenase/reductase (SDR family) X-linked | DHRSX | 0.64 |
| IMAGE:968695 | Hs.342274 | Transcribed sequences |  | 0.64 |
| IMAGE:701460 | Hs.23794 | checkpoint with forkhead and ring finger domains | CHFR | 0.64 |
| IMAGE:283461 | Hs.75277 | hypothetical protein FLJ13910 | FLJ13910 | 0.64 |
| IMAGE:1517136 | Hs.10283 | RNA binding motif protein 8A | RBM8A | 0.64 |
| IMAGE:843098 | Hs.511745 | brain abundant, membrane attached signal protein 1 | BASP1 | 0.64 |
| IMAGE:260200 | Hs.153837 | myeloid cell nuclear differentiation antigen | MNDA | 0.64 |
| IMAGE:743980 | Hs.499180 | Tropomyosin 3 | TPM3 | 0.64 |
| IMAGE:1897950 | Hs.122140 | Chromosome 15 open reading frame 29 | C15orf29 | 0.64 |
| IMAGE:768405 | Hs.278671 | GRIP and coiled-coil domain containing 2 | GCC2 | 0.64 |
| IMAGE:489407 | Hs.1710 | ATP-binding cassette, sub-family B (MDR/TAP), member 10 | ABCB10 | 0.64 |
| IMAGE:154706 | Hs.26230 | Transcribed sequences |  | 0.64 |
| IMAGE:133213 | Hs.390420 | fucosyltransferase 4 (alpha (1,3) fucosyltransferase, myeloid-specific) | FUT4 | 0.65 |
| IMAGE:1926749 | Hs.437475 | signal transducer and activator of transcription 6, interleukin-4 induced | STAT6 | 0.65 |
| IMAGE:51860 | Hs.438972 | chromosome 9 open reading frame 28 | C9orf28 | 0.65 |
| IMAGE:1703268 | Hs.521315 | Hypothetical protein LOC285888 (LOC285888), mRNA |  | 0.65 |
| IMAGE:324333 | Hs.355331 | Full length insert cDNA clone ZC35F11 |  | 0.65 |
| IMAGE:462807 | Hs.24970 | RAB39B, member RAS oncogene family | RAB39B | 0.65 |
| IMAGE:359184 | Hs.439523 | protein kinase, interferon-inducible double stranded RNA dependent | PRKR | 0.65 |
| IMAGE:289706 | Hs.46440 | solute carrier organic anion transporter family, member 1A2 | SLCO1A2 | 0.65 |
| IMAGE:26371 | Hs.479877 | Ubiquitin-activating enzyme E1-like 2 | UBE1L2 | 0.65 |
| IMAGE:1665321 | Hs.132019 | Transcribed sequences |  | 0.65 |
| IMAGE:1567661 | Hs.445499 | Lipase A, lysosomal acid, cholesterol esterase (Wolman disease) | LIPA | 0.65 |
| IMAGE:1624036 | Hs.130960 | Transcribed sequences |  | 0.65 |
| IMAGE:290057 | Hs.26812 | Chromosome 1 open reading frame 198 | C1orf198 | 0.65 |
| IMAGE:241489 | Hs.2551 | adrenergic, beta-2-, receptor, surface | ADRB2 | 0.65 |
| IMAGE:309638 | Hs.55047 | Full length insert cDNA clone ZB77E08 |  | 0.65 |
| IMAGE:1662723 | Hs.134219 | Calcyphosine 2 | CAPS2 | 0.65 |
| IMAGE:769944 | Hs.245342 | chromosome 9 open reading frame 100 | C9orf100 | 0.65 |
| IMAGE:151104 | Hs.76206 | cadherin 5, type 2, VE-cadherin (vascular epithelium) | CDH5 | 0.65 |
| IMAGE:724893 | Hs.83919 | glucosidase I | GCS1 | 0.65 |
| IMAGE:295545 | Hs.144056 | hypothetical protein FLJ32312 | FLJ32312 | 0.65 |
| IMAGE:322676 | Hs.129781 | chromosome 21 open reading frame 5 | C21orf5 | 0.65 |
| IMAGE:782700 | Hs.108614 | cytoplasmic linker associated protein 2 | CLASP2 | 0.65 |
| IMAGE:40036 | Hs.26038 | Transcribed sequences |  | 0.66 |
| IMAGE:366481 | Hs.432677 | keratin 6B | KRT6B | 0.66 |
| IMAGE:757434 | Hs.126428 | LOC389232 (LOC389232), mRNA |  | 0.66 |
| IMAGE:841338 | Hs.151032 | prion protein interacting protein | PRNPIP | 0.66 |
| IMAGE:1697776 | Hs.458733 | Transcribed sequences |  | 0.66 |
| IMAGE:1700880 | Hs.530358 | Nuclear RNA export factor 2 | NXF2 | 0.66 |
| IMAGE:301392 | Hs.193480 | Transcribed sequence with moderate similarity to protein sp:P39193 (H.sapiens) ALU6_HUMAN Alu subfamily SP sequence contamination warning entry |  | 0.66 |
| IMAGE:1703261 | Hs.326744 | fucosyltransferase 10 (alpha (1,3) fucosyltransferase) | FUT10 | 0.66 |
| IMAGE:768162 | Hs.283869 | chromosome 20 open reading frame 121 | C20orf121 | 0.66 |
| IMAGE:61386 | Hs.447458 | chromosome 10 open reading frame 6 | C10orf6 | 0.66 |
| IMAGE:1492356 | Hs.144980 | secretory carrier membrane protein 4 | SCAMP4 | 0.66 |
| IMAGE:203132 | Hs.387871 | tumor necrosis factor (ligand) superfamily, member 10 | TNFSF10 | 0.66 |
| IMAGE:305937 | Hs.48565 | sec1 family domain containing 2 | SCFD2 | 0.66 |
| IMAGE:138601 | Hs.368823 | KIAA1026 protein | KIAA1026 | 0.66 |
| IMAGE:304868 | Hs.49573 | CDNA FLJ44606 fis, clone BRACE2005991 |  | 0.66 |
| IMAGE:68345 | Hs.436639 | nuclear factor I/C (CCAAT-binding transcription factor) | NFIC | 0.66 |
| IMAGE:149013 | Hs.159118 | adenosylmethionine decarboxylase 1 | AMD1 | 0.66 |
| IMAGE:491627 | Hs.72062 | Protein kinase C, epsilon | PRKCE | 0.66 |
| IMAGE:278661 | Hs.26410 | hypothetical protein FLJ34443 | FLJ34443 | 0.66 |
| IMAGE:854879 | Hs.444484 | sphingosine kinase 2 | SPHK2 | 0.66 |
| IMAGE:259417 | Hs.517850 | STGC3 mRNA, complete cds |  | 0.66 |
| IMAGE:1760075 | Hs.444471 | kynureninase (L-kynurenine hydrolase) | KYNU | 0.66 |
| IMAGE:1856934 | Hs.342585 | Similar to Hypothetical protein KIAA0286 (HA6800) (LOC391468), mRNA |  | 0.66 |
| IMAGE:1156184 | Hs.391051 | hypothetical protein MGC2705 | MGC2705 | 0.66 |
| IMAGE:714083 | Hs.411958 | major histocompatibility complex, class I, F | HLA-F | 0.66 |
| IMAGE:742573 | Hs.112227 | membrane-associated nucleic acid binding protein | MNAB | 0.66 |
| IMAGE:1895722 | Hs.132773 | zinc finger protein 577 | ZNF577 | 0.66 |
| IMAGE:880640 | Hs.105081 | Transcribed sequences |  | 0.66 |
| IMAGE:683481 | Hs.86663 | CDNA FLJ36875 fis, clone ASTRO2019039 |  | 0.66 |
| IMAGE:2028638 | Hs.343713 | Transcribed sequences |  | 0.66 |
| IMAGE:1758193 | Hs.124603 | CDNA FLJ45253 fis, clone BRHIP2013447 |  | 0.66 |
| IMAGE:1625185 | Hs.344524 | deleted in lymphocytic leukemia, 1 | DLEU1 | 0.66 |
| IMAGE:1584142 | Hs.128231 | G antigen, family B, 1 (prostate associated) | GAGEB1 | 0.66 |
| IMAGE:43679 | Hs.107384 | CDNA FLJ40575 fis, clone THYMU2007339 |  | 0.66 |
| IMAGE:322461 | Hs.35198 | ectonucleotide pyrophosphatase/phosphodiesterase 5 (putative function) | ENPP5 | 0.66 |
| IMAGE:1870184 | Hs.149176 | similar to RIKEN cDNA 5730421E18 gene | MGC14798 | 0.66 |
| IMAGE:1915961 | Hs.527936 | Transcribed sequence with moderate similarity to protein ref:NP_061889.1 (H.sapiens) hypothetical protein FLJ20261 [Homo sapiens] |  | 0.66 |
| IMAGE:1836834 | Hs.438702 | KIAA1055 protein | KIAA1055 | 0.67 |
| IMAGE:416325 | Hs.454660 | CDNA FLJ26434 fis, clone KDN01892 |  | 0.67 |
| IMAGE:845604 | Hs.84162 | chromosome 3p21.1 gene sequence | HUMAGCGB | 0.67 |
| IMAGE:1574249 | Hs.127122 | Glutamate receptor, metabotropic 3 | GRM3 | 0.67 |
| IMAGE:279826 | Hs.531254 | hypothetical protein FLJ12303 | FLJ12303 | 0.67 |
| IMAGE:859816 | Hs.530168 | Transcribed sequence with weak similarity to protein ref:NP_060312.1 (H.sapiens) hypothetical protein FLJ20489 [Homo sapiens] |  | 0.67 |
| IMAGE:83995 | Hs.110675 | apolipoprotein E | APOE | 0.67 |
| IMAGE:377692 | Hs.300946 | Microfibril-associated glycoprotein-2 | MAGP2 | 0.67 |
| IMAGE:299539 | Hs.343809 | fibroblast growth factor 12 | FGF12 | 0.67 |
| IMAGE:743810 | Hs.30114 | cell division cycle associated 3 | CDCA3 | 0.67 |
| IMAGE:323611 | Hs.471252 | Transcribed sequences |  | 0.67 |
| IMAGE:1667323 | Hs.189174 | doublesex and mab-3 related transcription factor 3 | DMRT3 | 0.67 |
| IMAGE:377728 | Hs.91954 | Full length insert cDNA clone YX37E06 |  | 0.67 |
| IMAGE:2273326 | Hs.382126 | cadherin-like 22 | CDH22 | 0.67 |
| IMAGE:32801 | Hs.412128 | MGC4170 protein | MGC4170 | 0.67 |
| IMAGE:1902200 | Hs.98198 | hypothetical protein MGC45962 | MGC45962 | 0.67 |
| IMAGE:131519 | Hs.175596 | T-cell activation WD repeat protein | TA-WDRP | 0.67 |
| IMAGE:1521689 | Hs.130165 | Transcribed sequences |  | 0.67 |
| IMAGE:773242 | Hs.24135 | transmembrane protein vezatin | VEZATIN | 0.67 |
| 1292086 | Hs.414174 | testis nuclear RNA-binding protein | Tenr | 0.67 |
| IMAGE:264400 | Hs.283575 | Hypothetical gene supported by AK027125 (LOC402460), mRNA |  | 0.67 |
| IMAGE:1503670 | Hs.324335 | chromosome 19 open reading frame 15 | C19orf15 | 0.67 |
| IMAGE:782047 | Hs.428779 | AAAP6077 | UNQ6077 | 0.67 |
| IMAGE:1836587 | Hs.147415 | Transcribed sequences |  | 0.67 |
| IMAGE:236124 | Hs.449579 | Clone ASPBLL54 immunoglobulin lambda light chain VJ region mRNA, partial cds |  | 0.67 |
| IMAGE:1415197 | Hs.7621 | transcription elongation regulator 1-like | TCERG1L | 0.68 |
| IMAGE:683794 | Hs.323707 | Transcribed sequences |  | 0.68 |
| IMAGE:1899513 | Hs.151285 | Transcribed sequences |  | 0.68 |
| IMAGE:290505 | Hs.343820 | tau tubulin kinase 1 | TTBK1 | 0.68 |
| IMAGE:627676 | Hs.30884 | Monoglyceride lipase | MGLL | 0.68 |
| IMAGE:298063 | Hs.388728 | MRNA; cDNA DKFZp586K1721 (from clone DKFZp586K1721) |  | 0.68 |
| IMAGE:280633 | Hs.102648 | Transcribed sequences |  | 0.68 |
| IMAGE:255333 | Hs.32959 | G protein-coupled receptor kinase 4 | GRK4 | 0.68 |
| IMAGE:1636176 | Hs.3989 | plexin B2 | PLXNB2 | 0.68 |
| IMAGE:356940 | Hs.103241 | Transcribed sequence with weak similarity to protein sp:P39188 (H.sapiens) ALU1_HUMAN Alu subfamily J sequence contamination warning entry |  | 0.68 |
| IMAGE:240199 | Hs.347310 | hypothetical protein FLJ14627 | FLJ14627 | 0.68 |
| IMAGE:1608913 | Hs.484063 | slit homolog 3 (Drosophila) | SLIT3 | 0.68 |
| IMAGE:1837448 | Hs.528618 | MRNA; cDNA DKFZp686P07216 (from clone DKFZp686P07216) |  | 0.68 |
| IMAGE:1569604 | Hs.127765 | CDNA FLJ44654 fis, clone BRACE2047232 |  | 0.68 |
| IMAGE:201203 | Hs.75981 | ubiquitin specific protease 14 (tRNA-guanine transglycosylase) | USP14 | 0.68 |
| IMAGE:503499 | Hs.171025 | integrin, alpha 8 | ITGA8 | 0.68 |
| IMAGE:1472146 | Hs.311625 | phosphoribosyl pyrophosphate amidotransferase | PPAT | 0.68 |
| IMAGE:1506412 | Hs.368780 | FLJ30851 protein | FLJ30851 | 0.68 |
| IMAGE:2566877 | Hs.177548 | PMS2 postmeiotic segregation increased 2 (S. cerevisiae) | PMS2 | 0.68 |
| 1291986 | Hs.22587 | synovial sarcoma, X breakpoint 2 interacting protein | SSX2IP | 0.68 |
| IMAGE:1518581 | Hs.94785 | TGFB-induced factor 2 (TALE family homeobox) | TGIF2 | 0.68 |
| IMAGE:1055676 | Hs.165387 | CDNA FLJ33147 fis, clone UTERU2000218 |  | 0.68 |
| IMAGE:136286 | Hs.24701 | Clone IMAGE:5273245, mRNA |  | 0.68 |
| IMAGE:1638443 | Hs.131030 | Transcribed sequences |  | 0.68 |
| IMAGE:2090264 | Hs.72927 | interleukin 7 | IL7 | 0.68 |
| IMAGE:50114 | Hs.247734 | protocadherin alpha 5 | PCDHA5 | 0.68 |
| IMAGE:261163 | Hs.310735 | ATP-binding cassette, sub-family B (MDR/TAP), member 5 | ABCB5 | 0.68 |
| IMAGE:470393 | Hs.2256 | matrix metalloproteinase 7 (matrilysin, uterine) | MMP7 | 0.68 |
| IMAGE:2017695 | Hs.127842 | hepatoma-derived growth factor, related protein 3 | HDGFRP3 | 0.68 |
| IMAGE:276804 | Hs.310185 | Poly (ADP-ribose) polymerase family, member 8 | PARP8 | 0.68 |
| IMAGE:204755 | Hs.443458 | splicing factor, arginine/serine-rich 11 | SFRS11 | 0.68 |
| IMAGE:49630 | Hs.399966 | calcium channel, voltage-dependent, L type, alpha 1D subunit | CACNA1D | 0.69 |
| IMAGE:745318 | Hs.510751 | hypothetical protein DKFZp761I2123 | DKFZp761I2123 | 0.69 |
| IMAGE:297895 | Hs.436066 | leukocyte specific transcript 1 | LST1 | 0.69 |
| 1048965 | Hs.65750 | KIAA1086 | KIAA1086 | 0.69 |
| IMAGE:810445 | Hs.159637 | valyl-tRNA synthetase 2 | VARS2 | 0.69 |
| IMAGE:713087 | Hs.311097 | exportin 4 | XPO4 | 0.69 |
| IMAGE:566466 | Hs.259855 | elongation factor-2 kinase | EEF2K | 0.69 |
| IMAGE:460792 | Hs.46791 | mitochondrial carrier triple repeat 1 | MCART1 | 0.69 |
| IMAGE:292213 | Hs.185172 | guanine nucleotide binding protein (G protein), beta polypeptide 2 | GNB2 | 0.69 |
| IMAGE:300973 | Hs.85258 | CD8 antigen, alpha polypeptide (p32) | CD8A | 0.69 |
| IMAGE:47059 | Hs.30991 | ankyrin repeat domain 6 | ANKRD6 | 0.69 |
| IMAGE:1566394 | Hs.415471 | centaurin, alpha 2 | CENTA2 | 0.69 |
| IMAGE:276495 | Hs.44939 | Transcribed sequence with weak similarity to protein sp:P08547 (H.sapiens) LIN1_HUMAN LINE-1 REVERSE TRANSCRIPTASE HOMOLOG |  | 0.69 |
| IMAGE:129606 | Hs.370152 | WW domain containing adaptor with coiled-coil | WAC | 0.69 |
| IMAGE:756272 | Hs.169294 | transcription factor 7 (T-cell specific, HMG-box) | TCF7 | 0.69 |
| IMAGE:1565986 | Hs.135421 | Transcribed sequences |  | 0.69 |
| IMAGE:767176 | Hs.54673 | tumor necrosis factor (ligand) superfamily, member 13 | TNFSF13 | 0.69 |
| IMAGE:133719 | Hs.528123 | KIAA1018 protein | KIAA1018 | 0.69 |
| IMAGE:1626072 | Hs.130585 | Transcribed sequences |  | 0.69 |
| IMAGE:449042 | Hs.36269 | Transcribed sequence with weak similarity to protein pir:A32422 (H.sapiens) A32422 dihydrolipoamide S- |  | 0.69 |
| IMAGE:291416 | Hs.423747 | WD repeat and FYVE domain containing 1 | WDFY1 | 0.69 |
| IMAGE:1667259 | Hs.149995 | Transcribed sequences |  | 0.69 |
| IMAGE:150466 | Hs.511603 | Transcribed sequence with strong similarity to protein pir:A47501 (H.sapiens) A47501 nitric-oxide synthase |  | 0.69 |
| IMAGE:1517943 | Hs.172963 | hypothetical protein FLJ14624 | FLJ14624 | 0.69 |
| IMAGE:153541 | Hs.272311 | EphB1 | EPHB1 | 0.69 |
| IMAGE:1567220 | Hs.442354 | Transcribed sequence with moderate similarity to protein prf:2211404A (H.sapiens) 2211404A B219/OB receptor [Homo sapiens] |  | 0.69 |
| IMAGE:488596 | Hs.323949 | kangai 1 (suppression of tumorigenicity 6, prostate; CD82 antigen (R2 leukocyte antigen, antigen detected by monoclonal and antibody IA4)) | KAI1 | 0.69 |
| IMAGE:460802 | Hs.496560 | Acyl-CoA synthetase long-chain family member 4 | ACSL4 | 0.69 |
| IMAGE:416071 | Hs.58753 | FERM, RhoGEF and pleckstrin domain protein 2 | FARP2 | 0.69 |
| IMAGE:256680 | Hs.127217 | p10-binding protein | BITE | 0.69 |
| IMAGE:1551239 | Hs.135693 | hypothetical protein FLJ10884 | FLJ10884 | 0.69 |
| IMAGE:47234 | Hs.132158 | FAT tumor suppressor homolog 2 (Drosophila) | FAT2 | 0.69 |
| IMAGE:1667337 | Hs.124173 | Transcribed sequences |  | 0.69 |
| IMAGE:1544114 | Hs.436114 | CDNA FLJ46332 fis, clone TESTI4045470 |  | 0.69 |
| IMAGE:1521705 | Hs.94875 | hypothetical protein DKFZp761A132 | DKFZp761A132 | 0.69 |
| IMAGE:428309 | Hs.131314 | Hypothetical gene supported by BC040598 (LOC400960), mRNA |  | 0.69 |
| IMAGE:503654 | Hs.220901 | Transcribed sequence with strong similarity to protein ref:NP_065847.1 (H.sapiens) semaphorin 6A1; sema domain, transmembrane domain |  | 0.69 |
| IMAGE:1656479 | Hs.368200 | Chromosome 10 open reading frame 11 | C10orf11 | 0.69 |
| IMAGE:770801 | Hs.23272 | Transcribed sequence with weak similarity to protein ref:NP_079370.1 (H.sapiens) hypothetical protein FLJ22184 [Homo sapiens] |  | 0.69 |
| IMAGE:985705 | Hs.376617 | MICAL-like 2 | FLJ23471 | 0.69 |
| IMAGE:796159 | Hs.431762 | tetratricopeptide repeat-containing protein | LOC118491 | 0.69 |
| IMAGE:1553528 | Hs.124565 | solute carrier family 23 (nucleobase transporters), member 3 | SLC23A3 | 0.69 |
| IMAGE:376435 | Hs.110406 | SAM domain containing 1 | RP5-875H10.1 | 0.69 |
| IMAGE:1049330 | Hs.183428 | sarcospan (Kras oncogene-associated gene) | SSPN | 0.69 |
| IMAGE:2028161 | Hs.135187 | unc-93 homolog B1 (C. elegans) | UNC93B1 | 0.69 |
| IMAGE:811032 | Hs.406074 | PRKC, apoptosis, WT1, regulator | PAWR | 0.69 |
| IMAGE:243350 | Hs.44899 | nebulin-related anchoring protein | NRAP | 0.69 |
| IMAGE:1461100 | Hs.193115 | KIAA1764 protein | KIAA1764 | 0.69 |
| IMAGE:1901730 | Hs.511836 | FLJ42289 protein | FLJ42289 | 0.69 |
| IMAGE:435303 | Hs.397426 | KIAA1416 protein | KIAA1416 | 0.70 |
| IMAGE:1584259 | Hs.334938 | calcium-binding transporter | DKFZp586G0123 | 0.70 |
| IMAGE:221786 | Hs.288304 | hypothetical protein MGC33371 | MGC33371 | 0.70 |
| IMAGE:594382 | Hs.1657 | estrogen receptor 1 | ESR1 | 0.70 |
| IMAGE:739625 | Hs.227489 | syntrophin associated serine/threonine kinase | SAST | 0.70 |

Supplementary table 3. Summary of GSEA results with FDR<0.15

| Gene set name(a) | SIZE(b) | ES(c) | NES(d) | NOM p-val(e) | FDR q-val(f) |
| --- | --- | --- | --- | --- | --- |
| MAP00190 Oxidative phosphorylation | 48 | 0.75 | 1.94 | <0.00001 | 0.021 |
| Electron Transport Chain | 108 | 0.83 | 1.93 | <0.00001 | 0.021 |
| PGC related genes | 422 | 0.62 | 1.89 | <0.00001 | 0.021 |
| Mitochondrial genes | 442 | 0.64 | 1.89 | <0.00001 | 0.021 |
| Cell cycle checkpoint | 31 | 0.56 | 1.88 | <0.00001 | 0.024 |
| GO 0005739 mitochondrion | 169 | 0.64 | 1.88 | <0.00001 | 0.024 |
| Krebs-TCA Cycle | 28 | 0.74 | 1.88 | <0.00001 | 0.023 |
| VOXPHOS | 99 | 0.83 | 1.86 | <0.00001 | 0.023 |
| Human mitoDB 6 2002 | 426 | 0.65 | 1.84 | <0.00001 | 0.025 |
| MAP00230 Purine metabolism | 48 | 0.5 | 1.71 | <0.00001 | 0.052 |
| Glycolysis and Gluconeogenesis | 34 | 0.68 | 1.71 | <0.00001 | 0.051 |
| MAP00620 Pyruvate metabolism | 32 | 0.49 | 1.69 | <0.00001 | 0.058 |
| Electron transporter activity | 126 | 0.55 | 1.68 | <0.00001 | 0.055 |
| Reactive oxidative species related genes | 27 | 0.59 | 1.55 | <0.00001 | 0.137 |
| MAP00010 Glycolysis Gluconeogenesis | 53 | 0.5 | 1.54 | <0.00001 | 0.131 |

(a) genes encoding products in a metabolic pathway or sharing the same GO category

(b) Size of the set gene

(c) Enrichment score

(d) Normalized enrichment score

(e) nominal P-value : statistical signifiance of the ES

(f) false discovery rate q-value
